# Supplementary material
Source: PubMed Central journal article supplement (PMC3410959)
Supplement: NIHMS393418-supplement-1_si_001.pdf [file NIHMS393418-supplement-1_si_001.pdf]

## Supporting Information

# Merochlorins A–D, cyclic meroterpenoid antibiotics biosynthesized in divergent pathways with vanadium-dependent chloroperoxidases

*Leonard Kaysser,<sup>‡,†</sup> Peter Bernhardt,<sup>‡,†</sup> Sang-Jip Nam,<sup>‡,†</sup> Sandra Loesgen,<sup>†</sup> J. Graham Ruby,<sup>⊥</sup>  
Peter Skewes-Cox,<sup>⊥,‡</sup> Paul R. Jensen,<sup>†</sup> William Fenical<sup>\*,†</sup>, and Bradley S. Moore<sup>\*,†,¶</sup>*

<sup>‡</sup> These authors contributed equally to this work. <sup>†</sup> Scripps Institution of Oceanography, University of California, San Diego, CA 92093, <sup>⊥</sup> Howard Hughes Medical Institute, Bethesda, MD, 20815, and the Department of Biochemistry and Biophysics, University of California, San Francisco, CA 94158, <sup>‡</sup> Biological and Medical Informatics Program, University of California, San Francisco, CA 94158, <sup>¶</sup> Skaggs School of Pharmacy and Pharmaceutical Sciences, University of California, San Diego, CA 92093. \* Corresponding author: B. S. M.

bsmoore@ucsd.edu; W. F. wfenical@ucsd.edu

## Table of Contents

|                                                                                                       |     |
|-------------------------------------------------------------------------------------------------------|-----|
| Table of Contents                                                                                     | S2  |
| Experimental Section: General methods                                                                 | S4  |
| Experimental Section: Culture conditions                                                              | S4  |
| Experimental Section: Isolation of merochlorins A (1) and B (2)                                       | S5  |
| Experimental Section: Isolation of merochlorins C (3) and D (4)                                       | S6  |
| Experimental Section: Acetylation and methylation of merochlorin A                                    | S6  |
| Experimental Section: Structure Elucidation of merochlorins A–D (1–4)                                 | S7  |
| Experimental Section: Genomic DNA isolation and library construction                                  | S13 |
| Experimental Section: Illumina DNA sequencing and de novo assembly                                    | S13 |
| Experimental Section: Identification, sequencing, and annotation of the <i>mcl</i> gene cluster       | S14 |
| Experimental Section: Inactivation of <i>mcl17</i> in CNH-189                                         | S15 |
| Experimental Section: Heterologous expression of fosmids 3D9 and 6B10                                 | S15 |
| Experimental Section: Metabolite profiling of CNH-189 and <i>S. coelicolor</i> strains                | S16 |
| Table S1. NMR Spectral Data for Merochlorin A (1) in DMSO- <i>d</i> <sub>6</sub>                      | S18 |
| Table S2. NMR Spectral Data for Merochlorin B (2) in DMSO- <i>d</i> <sub>6</sub>                      | S19 |
| Table S3. NMR Spectral Data for Merochlorins C (3) and D (4) in DMSO- <i>d</i> <sub>6</sub>           | S20 |
| Table S4. MIC Values for Merochlorins A–D (1–4) against MRSA                                          | S21 |
| Table S5. PCR Primers                                                                                 | S22 |
| Table S6. Gene Table                                                                                  | S23 |
| Figure S1. <sup>1</sup> H NMR Spectrum (600 MHz) of Merochlorin A (1) in DMSO- <i>d</i> <sub>6</sub>  | S25 |
| Figure S2. <sup>13</sup> C NMR Spectrum (150 MHz) of Merochlorin A (1) in DMSO- <i>d</i> <sub>6</sub> | S26 |
| Figure S3. COSY Spectrum (600 MHz) of Merochlorin A (1) in DMSO- <i>d</i> <sub>6</sub>                | S27 |
| Figure S4. HSQC Spectrum (600 MHz) of Merochlorin A (1) in DMSO- <i>d</i> <sub>6</sub>                | S28 |
| Figure S5. HMBC Spectrum (600 MHz) of Merochlorin A (1) in DMSO- <i>d</i> <sub>6</sub>                | S29 |

|                                                                                                                 |     |
|-----------------------------------------------------------------------------------------------------------------|-----|
| Figure S6. ROESY Spectrum (600 MHz) of Merochlorin A ( <b>1</b> ) in DMSO- <i>d</i> <sub>6</sub>                | S30 |
| Figure S7. <sup>1</sup> H NMR Spectrum (500 MHz) of Merochlorin B ( <b>2</b> ) in DMSO- <i>d</i> <sub>6</sub>   | S31 |
| Figure S8. <sup>13</sup> C NMR Spectrum (125 MHz) of Merochlorin B ( <b>2</b> ) in DMSO- <i>d</i> <sub>6</sub>  | S32 |
| Figure S9. gCOSY Spectrum (500 MHz) of Merochlorin B ( <b>2</b> ) in DMSO- <i>d</i> <sub>6</sub>                | S33 |
| Figure S10. gHSQC Spectrum (500 MHz) of Merochlorin B ( <b>2</b> ) in DMSO- <i>d</i> <sub>6</sub>               | S34 |
| Figure S11. gHMBC Spectrum (500 MHz) of Merochlorin B ( <b>2</b> ) in DMSO- <i>d</i> <sub>6</sub>               | S35 |
| Figure S12. ROESY Spectrum (600 MHz) of Merochlorin B ( <b>2</b> ) in DMSO- <i>d</i> <sub>6</sub>               | S36 |
| Figure S13. <sup>1</sup> H NMR Spectrum (500 MHz) of Merochlorin C ( <b>3</b> ) in DMSO- <i>d</i> <sub>6</sub>  | S37 |
| Figure S14. <sup>13</sup> C NMR Spectrum (150 MHz) of Merochlorin C ( <b>3</b> ) in DMSO- <i>d</i> <sub>6</sub> | S38 |
| Figure S15. <sup>1</sup> H NMR Spectrum (500 MHz) of Merochlorin D ( <b>4</b> ) in DMSO- <i>d</i> <sub>6</sub>  | S39 |
| Figure S16. <sup>13</sup> C NMR Spectrum (75 MHz) of Merochlorin D ( <b>4</b> ) in DMSO- <i>d</i> <sub>6</sub>  | S40 |
| Figure S17. Contigs obtained from Illumina sequencing                                                           | S41 |
| Figure S18. LC-MS analysis of extracts from <i>S. coelicolor</i> M1154/merLK01                                  | S42 |
| References                                                                                                      | S43 |

## Experimental Section

### General methods

Optical rotations were measured using a Rudolph Research Analytical Autopol III polarimeter (Hackettstown, NJ, USA) with a 10-cm cell. UV spectra were acquired with an Varian Cary UV-visible spectrophotometer (Agilent Technologies, Santa Clara, CA, USA) using a path length of 1 cm. IR spectra were acquired with a Perkin-Elmer PE 1600 FTIR spectrophotometer (Perkin-Elmer, Waltham, MA, USA). NMR spectra were acquired with 500 or 600 MHz Varian Inova spectrometers using dimethyl sulfoxide (DMSO)- $d_6$  or chloroform- $d_3$  ( $CDCl_3$ ) containing tetramethylsilane ( $Me_4Si$ ) as an internal standard. HRMS analysis was conducted with time-of-flight detection. Low-resolution MS data were collected with a Agilent 1100 LC-MS instrument (Agilent Technologies), and the analytes were separated with a reversed-phase  $C_{18}$  column (Phenomenex Luna  $5\mu$  C18(2), 4.6 mm  $\times$  100 mm) using a flow rate of 0.7 mL/min. DNA isolation and manipulations were performed using standard methods for *Escherichia coli* and *Streptomyces*.<sup>1,2</sup>

### Culture conditions

To isolate merochlorins **1** and **2**, 60 x 1 L of CNH-189 was cultured in 2.8-L Fernbach flasks with seawater-based medium (10 g/L starch, 4 g/L yeast extract, 2 g/L peptone, 1 g/L  $CaCO_3$ , 40 mg/L  $Fe_2(SO_4)_3 \cdot 4H_2O$ , and 100 mg/L KBr) at 27 °C. After 7 days of cultivation, sterilized XAD16 resin (20 g/L) was added as an adsorbent. To isolate merochlorins **3** and **4**, 40 L of CNH-189 was cultured in 2.8-L Fernbach flasks each containing 1 L of a deionized water-based medium (M1: 10 g/L glucose, 20 g/L Grandma's molasses, 5 g/L peptone, 2 g/L  $CaCO_3$ , 40

mg/L Mg(SO<sub>4</sub>)·4H<sub>2</sub>O, 200 mg/L KCl, 200 mg/L KBr, and 40 mg/L Fe<sub>2</sub>(SO<sub>4</sub>)<sub>3</sub>·4H<sub>2</sub>O) at 27 °C. After 24 h of cultivation, sterilized XAD7HP resin (20 g/L) was added, and the culture was incubated for an additional 5 days at 27 °C.

### Isolation of merochlorins A (1) and B (2)

Briefly, the cell culture medium was incubated with XAD16 resin (20 g/L) for 2 h at 215 rpm at room temperature, and the resin was collected by filtering through cheesecloth. The resin was then washed with deionized water and eluted with acetone. The acetone was removed under reduced pressure, and the remaining aqueous layer was extracted with ethyl acetate (EtOAc) (3 × 500 mL). The ethyl acetate-soluble fraction was dried in vacuo to yield 4.5 g of crude extract containing **1** and **2**. The crude extract was fractionated by silica gel column chromatography (25 g) by elution with a step gradient of dichloromethane and methanol. The 100:1 dichloromethane:methanol fraction contained a mixture of the merochlorins and was purified further by reversed-phase HPLC (Phenomenex Luna 5 $\mu$  C18(2), 250 × 100 mm, 2.0 mL/min, 100 Å, 210 nm detection) using isocratic conditions, 85% MeCN in water. HPLC separation afforded **1** (21 mg) and **2** (7 mg). Merochlorin A: Table S1 and reference.<sup>3</sup> Merochlorin B (**2**):  $[\alpha]_D^{21} = +23$  (c = 0.27, MeOH); IR (KBr)  $\nu_{\max} = 3199, 2928, 1645, 1457, 1329, 1279, 1162, 1065, \text{ and } 841 \text{ cm}^{-1}$ ; UV (MeOH)  $\lambda_{\max} (\log \epsilon) = 242 (3.1), 261 (4.2), 255 (4.2), 272 (4.3), \text{ and } 349 (4.3) \text{ nm}$ ; <sup>1</sup>H and <sup>13</sup>C NMR (500 MHz, DMSO-d<sub>6</sub>) (Table S2); HR-ESI-MS (C<sub>25</sub>H<sub>30</sub><sup>35</sup>ClO<sub>4</sub>):  $m/z 429.1818 [M+H]^+$ , calculated  $m/z 429.1827 [M+H]^+$ .

### Isolation of merochlorins C (3) and D (4)

After culture in the presence of XAD7HP resin, the resin was collected on cheesecloth, washed with deionized water, and eluted with acetone. The acetone was removed under reduced pressure, and the remaining aqueous layer was extracted with EtOAc ( $3 \times 500$  mL). The EtOAc-soluble fraction was dried in vacuo to yield 4.7 g of crude extract containing **3** and **4**. The crude extract was fractionated and purified as described above. HPLC separation afforded **4** (15 mg) and **3** (40 mg) as pale-yellow oils. Merochlorin C (**3**):  $[\alpha]_D^{21} = +34$  ( $c = 0.25$ , MeOH); UV (MeOH)  $\lambda_{\max}$  ( $\log \epsilon$ ) = 224 (4.6), 239 (4.7), 296 (4.3), and 334 (4.3) nm; IR (KBr)  $\nu_{\max} = 3380$ , 2931, 1704, 1629, 1373, 1271, and 860  $\text{cm}^{-1}$ ;  $^1\text{H}$  and  $^{13}\text{C}$  NMR (500 MHz, DMSO- $d_6$ ) (Table S3); HR-ESI-MS ( $\text{C}_{26}\text{H}_{32}^{35}\text{Cl}_2\text{O}_5\text{Na}$ ): found  $m/z$  517.1518  $[\text{M}+\text{Na}]^+$ , calculated  $m/z$  517.1519  $[\text{M}+\text{Na}]^+$ . Merochlorin D (**4**):  $[\alpha]_D^{21} = +28$  ( $c = 0.2$ , MeOH); UV (MeOH)  $\lambda_{\max}$  ( $\log \epsilon$ ) = 245 (4.7), 301 (4.2), and 360 (4.3) nm; IR (KBr)  $\nu_{\max} = 3380$ , 2930, 1705, 1628, 1373, 1271, and 860  $\text{cm}^{-1}$ ;  $^1\text{H}$  and  $^{13}\text{C}$  NMR (500 MHz, DMSO- $d_6$ ) (Table S3); HR-ESI-MS ( $\text{C}_{26}\text{H}_{33}^{35}\text{ClO}_5\text{Na}$ ): found  $m/z$  483.1907  $[\text{M}+\text{Na}]^+$ , calculated  $m/z$  483.1909  $[\text{M}+\text{Na}]^+$ .

### Acetylation and methylation of merochlorin A

Merochlorin A (**1**, 4.0 mg) was dissolved in freshly distilled pyridine (2 mL). Several dry crystals of dimethylaminopyridine were added, and the mixture was stirred for 15 min at room temperature. Acetic anhydride (3 mL) was added to the solution, and the reaction mixture was stirred for 12 h. The reaction was quenched with water, and the resulting mixture was extracted with EtOAc. The solvent was removed in vacuo and the residual material was dissolved in dry acetone (2 mL). An excess of  $\text{K}_2\text{CO}_3$  and methyl iodide was added (1.5 mL), and after stirring for 6 h, the reaction mixture was filtered and evaporated, and the residual material was subjected

to reversed-phase HPLC (Phenomenex Luna 5 $\mu$  C18(2), 250  $\times$  100 mm, 2.0 mL/min, 100  $\text{\AA}$ , 210 nm detection) using isocratic conditions (95% MeCN in water). HPLC separation afforded 3-acetyl-5-methyl-merochlorin A (3.5 mg). The crystal structure is shown in Fig. 1.  $^1\text{H}$  NMR (600 MHz, chloroform- $d_3$ ):  $\delta$  (ppm) 6.80 (1H, d,  $J = 1.0$  Hz), 6.54 (1H, d,  $J = 1.0$  Hz), 4.96 (1H, t,  $J = 7.0$  Hz), 3.87 (3H, s), 3.17 (1H, d,  $J = 15.8$  Hz), 2.74 (1H, d,  $J = 15.8$  Hz), 2.39 (3H, s), 2.38-2.36 (3H, m), 2.10 (1H, m), 1.80 (1H, m), 1.75 (3H, s), 1.62 (3H, s), 1.58 (1H, m), 1.57 (3H, s), 1.55 (3H, s), 1.18 (1H, m), 0.93 (3H, s).

### Structure elucidation of merochlorins A–D (1–4)

The assignment, structure, and bioactivity of merochlorin A (**1**) were recently published.<sup>3</sup> The crystal structure is reported in this manuscript, confirming the structure of merochlorin A reported by Saukoulas *et al.* What follows is a detailed description of the structure elucidation of merochlorins A–D (**1–4**). Throughout the structure elucidation section, the carbon atoms were numbered according to the following convention:

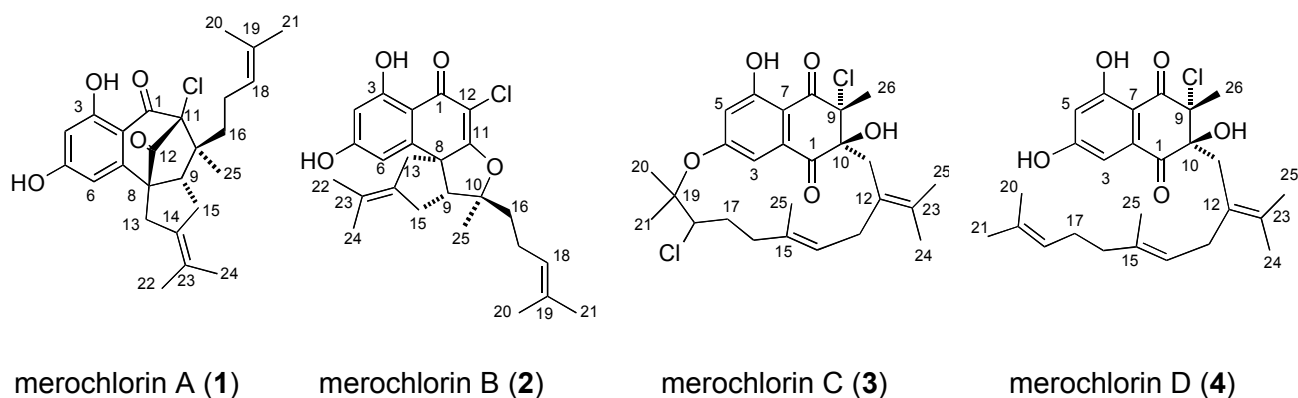

Merochlorin A (**1**) was isolated as a pale-yellow oil with a molecular formula of  $C_{25}H_{29}^{35}ClO_4$  based on HR-ESI-MS (a pseudo-molecular ion peak at  $m/z$  429.1821  $[M+H]^+$ ) and  $^{13}C$  NMR data. Strong UV absorption of **1** was observed at 240, 296, and 330 nm corresponding to conjugated, aromatic, or phenolic functional groups. The IR spectrum of **1** showed broad absorptions of multiple hydroxyl groups ( $3380\text{ cm}^{-1}$ ) and carbonyl groups ( $1704\text{ cm}^{-1}$ ). The  $^1H$  NMR spectrum of **1** displayed a pair of *meta*-coupled aromatic protons [H-4 ( $\delta_H$  6.16), H-6 ( $\delta_H$

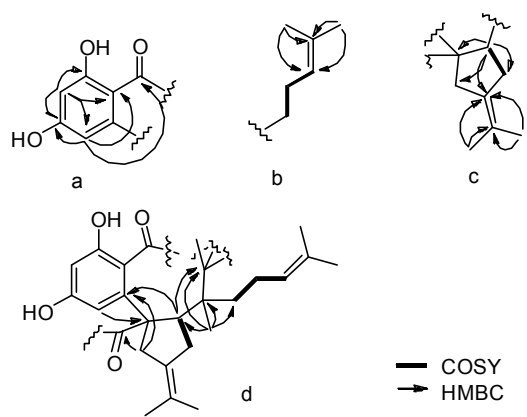

6.38)], one olefin proton [H-18 ( $\delta_H$  4.92)], five methyl singlet protons [H-21 ( $\delta_H$  1.53), H-20 ( $\delta_H$  1.45), H-24 ( $\delta_H$  1.65), H-22 ( $\delta_H$  1.56), H-25 ( $\delta_H$  0.81)], and an exchangeable proton [3-OH ( $\delta_H$  11.9)]. The  $^{13}C$  NMR and HSQC data revealed two carbonyl carbons, ten quaternary carbons, four methine carbons, four methylene carbons, and five methyl carbons.

Two-dimensional NMR spectral analysis allowed assembly of three fragments (**a-c**) shown to the left. The first fragment (**a**) was assembled by analyzing the  $^1H$ - $^1H$  coupling constants. The *meta*-coupling of two aromatic protons [H-4 ( $\delta_H$  6.16, d,  $J = 2.0$  Hz), H-6 ( $\delta_H$  6.38, d,  $J = 2.0$  Hz)] indicated the presence of a 1,2,3,5-tetrasubstituted benzene moiety. The long-range HMBC correlation from the aromatic proton H-4 to carbon atoms C-3 ( $\delta_C$  165.4) and C-5 ( $\delta_C$  166.5) suggested that C-3 and C-5 had hydroxyl group substituents. The presence of two hydroxyl groups was confirmed by the methylation of 5-OH followed by the acetylation of 3-OH. The carbon chemical shift of C-1 ( $\delta_C$  193.2), and the presence of a chelated hydroxyl proton [3-OH ( $\delta_H$  11.59)], strongly suggested a ketone group at C-1. The second fragment (**b**), the C-6 isoprene



side chain of the molecule, was established by COSY cross-peaks and HMBC correlations. The COSY cross-peaks of protons H-16 through H-18 [H-16 ( $\delta_{\text{H}}$  1.40, 1.14), H-17 ( $\delta_{\text{H}}$  2.03, 1.75), H-18 ( $\delta_{\text{H}}$  4.92)], and the long-range HMBC correlations from olefinic proton H-18 to carbons C-19 ( $\delta_{\text{C}}$  131.6), C-20 ( $\delta_{\text{C}}$  18.1), and C-21 ( $\delta_{\text{C}}$  26.1), allowed the assignment of the C-16 to C-21 side-chain fragment. The third fragment (**c**), the propan-2-ylidenecyclopentane moiety, was assigned by analysis of COSY and HMBC data. COSY cross-peaks between H-9 and H-15, and long-range HMBC correlations (from H-15 to C-8, C-9, C-13, C-14, and C-23; from H-22 to C-14 and C-23; and from H-24 to C-14 and C-23), allowed the assignment of the propan-2-ylidenecyclopentane moiety.

Fragments **a-c** were connected to form fragment **d** by analysis of HMBC spectroscopic data. The linkage between C-7 and C-8 was established by three-bond HMBC correlations from H-6 to C-2, C-4, and C-8, and two-bond HMBC correlations from H-6 to C-5 and C-7. The C-16/C-10, C-10/C-11, and C-10/C-9 connections were established by long-range HMBC correlations from H-16 to C-9, C-10, and C-11; from H-15 to C-9 and C-10; and from singlet methyl proton H-25 to C-9, C-10, C-11, and C-16, respectively. The C-12/C-8 connection was established by long-range HMBC correlations from H-13 to C-8 and C-12 as well as from H-9 to C-8 and C-12.

The remaining connectivities were challenging to establish because of the absence of any proton correlations between C-1, C-11, and C-12. Thus, we carefully analyzed the chemical shifts of C-1 ( $\delta_{\text{C}}$  193.2), C-12 ( $\delta_{\text{C}}$  200.1), and C-11 ( $\delta_{\text{C}}$  91.1). This analysis allowed us to connect the remaining chlorine atom to C-11 and to establish the C-1/C11 and C-11/C-12 connections. The

relative configuration of **1** (8*R*, 9*R*, and 10*S*) was determined by ROESY correlations between H-16 and H-9 and between H-15 and H-25.

The molecular formula of merochlorin B (**2**) was assigned as C<sub>25</sub>H<sub>29</sub><sup>35</sup>ClO<sub>4</sub> based on a pseudo-molecular ion peak (*m/z* 429.1821 [M+H]<sup>+</sup>) and <sup>13</sup>C NMR data. The <sup>1</sup>H NMR spectrum of **2** had similar features to that of **1**, but large chemical shift differences in the <sup>13</sup>C NMR spectrum were observed for five carbons (C-1, C-10, C-11, C-12, and C-13) as compared to the <sup>13</sup>C NMR data for **1**. Two-dimensional NMR analysis allowed the assignment of three fragments: a dihydroxynaphthalenone, a C-6 sesquiterpene side chain, and a propan-2-ylidenecyclopentane moiety. The *meta*-coupling between two aromatic protons [H-4 ( $\delta_{\text{H}}$  6.15, d, *J* = 2.0 Hz), H-6 ( $\delta_{\text{H}}$  6.17, d, *J* = 2.0 Hz)], the chelated hydroxyl proton [3-OH ( $\delta_{\text{H}}$  12.9)], and the upfield-shifted chemical shift of C-1 ( $\delta_{\text{C}}$  184.0) strongly suggested the presence of a dihydroxynaphthalenone moiety in **2**. In addition, two- or three-bond HMBC correlations from H-4 to C-2 and from 3-OH to C-2, C-3, and C-4, as well as four-bond HMBC correlations from H-4 to C-1 and from H-6 to C-1, constructed the dihydroxynaphthalenone moiety. The C-6 sesquiterpene side chain of **2** was established by COSY and HMBC correlations. The COSY cross-peaks for H-16 through H-18, and the long-range HMBC correlations from H-18 to C-19 and from C-20 to C-21 permitted the assignment of the C-16 to C-21 side chain. The propan-2-ylidenecyclopentane moiety was assigned based on COSY cross-peaks between H-9 and H-15 and long-range HMBC correlations from H-15 to C-8, C-9, C-13, C-14, and C-23 as well as from methyl singlet proton H-22 to C-14, C-23 and C-24. These three fragments were assembled on the basis of HMBC spectroscopic data. The long-range HMBC correlations from H-6 to C-2, C-4, C-6, and C-8 and from H-13 to C-7, C-8, and C-9 allowed the first and third fragments to be connected to quaternary carbon C-

8. The connection between C-8 and C-11 was also established by three-bond HMBC correlations from H-13 to C-11 and from H-9 to C-11. The second and third fragments were connected to quaternary carbon C-10 based on long-range HMBC correlations from singlet methyl proton H-25 to C-9, C-10, and C-16; from H-16 to C-9, C-10, and C-25; from H-15 to C-8, C-9, and C-10; and from H-9 to C-15, C-8, C-10, C-11, and C-25. Finally, the remaining chlorine atom was attached to C-12, and the ether linkage between C-10 and C-11 was established, based on the chemical shifts of C-11 ( $\delta_C$  174.0) and C-12 ( $\delta_C$  99.8). The relative configurations of C-8, C-9 and C-10 of **2** (8*S*, 9*R*, and 10*S*) were determined by ROESY correlations between H-25 and H-15, between H-15 and H-13, and between H-9 and H-16.

Merochlorin C (**3**) was isolated as a pale-yellow oil, and its molecular formula was assigned as C<sub>26</sub>H<sub>32</sub><sup>35</sup>Cl<sub>2</sub>O<sub>5</sub> based on HR-ESI-MS (a pseudo-molecular ion peak at *m/z* 517.1516 [M+Na]<sup>+</sup>) and <sup>13</sup>C NMR data. The <sup>1</sup>H NMR spectrum of **3** displayed two *meta*-coupled aromatic protons [H-3 ( $\delta_H$  7.19), H-5 ( $\delta_H$  6.91)], one olefin proton H-14 ( $\delta_H$  4.36), protons corresponding to six methyl groups [H-20 ( $\delta_H$  1.58), H-21 ( $\delta_H$  1.70), H-22 ( $\delta_H$  1.76), H-24 ( $\delta_H$  1.59), H-25 ( $\delta_H$  0.98), and H-26 ( $\delta_H$  1.74)], and one exchangeable proton [10-OH ( $\delta_H$  5.78)]. The two *meta*-coupled aromatic protons (H-3 and H-5) in the <sup>1</sup>H NMR spectrum of **3** as well as the two oxygenated aromatic carbons (C-4 and C-6) and the two carbonyl carbons (C-1 and C-8) in the <sup>13</sup>C NMR spectrum suggested the presence of a dihydronaphthalenedione moiety. The long-range HMBC correlations from H-3 to C-1, C-2, C-4, C-7, and C-8 and from H-5 to C-3, C-4, C-6, C-7, and C-8 also supported the presence of a dihydronaphthalenedione moiety. Analysis of 2D NMR spectroscopic data allowed the construction of the sesquiterpene bridge. The H-17/H-16 and H-17/H-18 correlations in the COSY spectrum of **3** assisted in the connection of C-16 to C-18. Two

methyl singlet protons (H-20 and H-21) attached to carbon C-19 exhibited long-range HMBC correlations to carbon C-18, and allowed the connectivity to be expanded from C-18 to C-19. The long-range HMBC correlation from methyl singlet proton H-25 to olefinic carbons C-14, C-15, and the methylene carbon C-16 allowed the expansion of the carbon unit from C-14 to C-16. The COSY cross-peaks between H-14 and H-13 and long-range HMBC correlations from H-13 to C-12, C-21, and C-11 as well as from the two methyl singlet protons H-24 and H-22 to carbon atoms C-12 and C-21 established the C-14/C-13, C-13/C-12, C-12/C-11, and C-12/C-21 connections. The four-bond HMBC correlation from singlet methyl proton H-21 to C-4 revealed the ether linkage between C-19 and C-4. The long-range HMBC correlations from the methylene proton H-11 to C-1, C-10, and C-9 as well as from the solvent-exchangeable proton 10-OH to C-1, C-9, C-10, and C-11 allowed the connection between C-10 and C-11 to be established and allowed the placement of the hydroxyl group at C-10. The long-range HMBC correlations from methyl singlet proton H-26 to C-8, C-9, and C-10 allowed the connection between H-26 and C-9. Lastly, the attachment of two chlorine atoms to C-9 and C-18 completed the assignment of the planar structure of **3**. The ROESY correlation between H-14 and H-16 established a *14E* configuration of the olefinic bond, and the ROESY correlation between solvent-exchangeable proton 10-OH and methyl singlet proton H-26 allowed the relative configurations of C-9 and C-10 to be designated as *9R\** and *10S\**, respectively.

Merochlorin D (**4**) was isolated as a pale-yellow oil which molecular formula was assigned as  $C_{26}H_{33}^{35}ClO_5$  based on HR-ESI-MS (pseudo-molecular ion peak at  $m/z$  483.1907  $[M+Na]^+$ ) and  $^{13}C$  NMR data. The  $^1H$  NMR spectrum of **4** was nearly identical to that of **3** (see above) except for the presence of one olefinic proton [H-18 ( $\delta_H$  4.97)]. The HMBC correlations from the

olefinic proton H-18 to C-19, C-20, and C-21 suggested that **4** contained a double bond at C-19. Analysis of 2D NMR spectroscopic data allowed the planar structure of **4** to be assigned. The ROESY correlation between H-14 and H-16 established the 14*E* configuration of the double bond, and the ROESY correlation between 10-OH and H-26 suggested that C-9 and C-10 had *R*\* and *S*\* relative configurations, respectively.

### **Genomic DNA isolation and library construction**

Mycelium of CNH-189 was inoculated in A1 medium (10 g/L starch, 4 g/L yeast extract, and 2 g/L peptone in filtered seawater). After 3 days at 28 °C, genomic DNA was isolated by phenol–chloroform extraction.<sup>2</sup> The isolated genomic DNA was then randomly sheared to provide short DNA fragments (200 ± 50 bp) and longer DNA fragments (40 ± 5 kb). The short DNA fragments were processed for paired-end Illumina DNA sequencing according to the manufacturer's instructions (Illumina Inc., CA, USA). The large DNA fragments were cloned into fosmid pCCFOS1, and a 500-clone fosmid library was prepared according to the manufacturer's instructions (Epicentre Biotechnologies, WI, USA).

### **Illumina DNA sequencing and de novo assembly**

Paired-end Illumina DNA sequencing (65 nucleotide (nt)-reads, version 4) was performed with an Illumina Genome Analyzer Iix using a genomic library concentration of 50 nM. Translated-query BLAST (BLASTx) was used to query reads against a custom database of annotated proteins from the napyradiomycin biosynthetic gene cluster.<sup>4</sup> If both reads of a paired-end had matching expectation values <10<sup>-6</sup>, these reads were used as seeds for a targeted local assembly using an alpha version of the Paired-Read Iterative Contig Extension (PRICE) software. PRICE

uses paired-end information to generate localized assemblies that extend existing contigs; in this case, the initial contigs were reads with the high-quality BLASTx matches described above, and the contigs were repeatedly extended through as many cycles as possible, until local drops in coverage prohibited further extension. PRICE is open-source and can be downloaded for free (<http://derisilab.ucsf.edu/software/price/index.html>).

### **Identification, sequencing, and annotation of the merochlorin gene cluster**

Illumina sequencing and de novo assembly provided three contigs with approximately 30 kb of sequence homologous to known merochlorin biosynthetic genes, including *mcl17*.<sup>5</sup> Primers pksIII\_fwd and pksIII\_rev (Table S5), amplifying a 0.53-kb fragment of *mcl17*, were used for the PCR screening of the fosmid library, resulting in the isolation of fosmid 3D9. Double-stranded sequencing of the entire fosmid clone 3D9 (36,134-bp insert) was performed with the shotgun method by GenoTech (Baejeon, Korea) using 0.5–1.0 kb DNA fragments. A contiguous 36.1-kb region was assembled with an average GC content of 71.1%, characteristic of *Streptomyces* DNA. In addition, overlapping fosmids were isolated by PCR screening of the genomic library, and the sequence gaps were closed by primer walking. The complete sequence of the merochlorin biosynthetic gene cluster (57,647 bp) is available at NCBI under the accession number JX186999. In silico sequence analysis was performed using GC frame-plot,<sup>6</sup> BLAST,<sup>7</sup> and conserved protein domain searches.<sup>8</sup> The Geneious software package (Biomatters Ltd., Auckland, New Zealand) and Artemis (Wellcome Trust Genome Campus, Cambridge, UK) were used for sequence analysis and annotation. Sequence alignments were constructed using the ClustalX algorithm<sup>9</sup> and the GeneDoc alignment editor.<sup>10</sup>

### **Inactivation of *mcl17* in CNH-189**

An apramycin resistance cassette was amplified from plasmid pIJ773 using primers *mcl17*-fwd and *mcl17*-rev (Table S5). The *mcl17* gene was replaced in *E. coli* BW25113/pKD20/3D9 using Red/ET-mediated recombination,<sup>11</sup> and the resulting fosmid merPB01 was confirmed by PCR. merPB01 was then transferred to *E. coli* S-17<sup>12</sup> and introduced into *Streptomyces* sp. CNH-189 by conjugation. Exconjugants resistant to apramycin were isolated and tested for the loss of chloramphenicol resistance indicating a successful double crossover. Three mutants were confirmed by PCR and designated CNH-189  $\Delta$ *mcl17* 1–3.

### **Heterologous expression of fosmids 3D9 and 6B10**

A 4,443-bp region was amplified from the integrative shuttle vector pSET152<sup>13</sup> using primers *int*-fwd and *int*-rev (Table S5; the italicized letters represent extensions for the homologous recombination with the *cat* gene of pSET152). The PCR-amplified region contained an *attP* attachment site, the integrase gene (*int*) of phage C31, an origin of transfer (*oriT*) and apramycin resistance marker *aac(3)IV*. The PCR product was used to replace the chloramphenicol resistance marker (*cat*) in the backbone of fosmid BHXS1782.<sup>14</sup> The resulting construct pAEM21 was verified by restriction analysis and PCR. A 6,610-bp *Xba*I restriction fragment from pAEM21 was purified and used to replace the chloramphenicol resistance cassette in BPW1945 to generate pksLK09. A 934-bp region was amplified from SuperCos1 (Agilent Technologies, CA, USA) using primers apEXkan\_fwd and apEXkan\_rev (Table S5). The PCR product contained the kanamycin resistance marker (*neo*) and a 130-bp sequence upstream of the *neo* gene, a region that should include the *neo* promoter. After replacing the apramycin resistance gene and its promoter on pksLK09 using Red/ET-mediated recombination,<sup>15</sup> a 6,645-bp *Xba*I

restriction fragment was generated. This fragment comprised the *attP*, *int*, *oriT*, *neo*, and *neoP* components as well as a 408-bp sequence at the 5'-end and a 1,758-bp sequence at the 3'-end, homologous to the regions flanking the *cat* gene of pCC1FOS. This fragment thus represents a general cassette for the modification of pCC1FOS-based fosmids to allow stable integration of gene clusters into *Streptomyces* genomes. The cassette was named *int\_neo* and was subsequently used to replace the *cat* gene in *E. coli* BW25113/pKD20/3D9 and *E. coli* BW25113/pKD20/6B10 via Red/ET-mediated recombineering.<sup>11,15</sup> The resulting fosmids *merLK01* and *merLK30* were verified by restriction analysis, transferred into *E. coli* ET12567,<sup>16</sup> and introduced into *S. coelicolor* M1152 and M1154<sup>17</sup> by triparental intergeneric conjugation with *E. coli* ET12567/pUB307.<sup>18</sup> Three kanamycin-resistant clones were selected, verified by PCR, and named *S. coelicolor* M1154/*merLK01* 1–3 and *S. coelicolor* M1152/*merLK30* 1–3, respectively.

### **Metabolite profiling of CNH-189 and *S. coelicolor* strains**

Frozen stocks of CNH-189 (wild-type or mutant) were inoculated in A1 medium. After 3 days of incubation at 28 °C, the culture was transferred (10% final concentration) to 50 mL of M1 medium in a 250-mL Erlenmeyer flask equipped with a spring and a foam plug to prevent aggregation of the mycelium and to facilitate aeration, respectively. A spore stock of *S. coelicolor* M1154 (wild-type or fosmid-containing) was handled the same way, except that it was inoculated in tryptic soy broth (TSB) medium (17 g/L tryptone, 3 g/L soytone, 2.5 g/L glucose, 5 g/L NaCl, and 2.5 g/L K<sub>2</sub>HPO<sub>4</sub> at pH 7.3) and then transferred to 50 mL of R5 medium (103 g/L sucrose, 0.25 g/L K<sub>2</sub>SO<sub>4</sub>, 10.12 g/L MgCl<sub>2</sub>·6H<sub>2</sub>O, 10 g/L glucose, 0.1 g/L Casaminoacids, 5 g/L yeast extract, 5.73 g/L TES (*N*-tris(hydroxymethyl)methyl-2-aminoethanesulfonic acid), 80 µg/L



ZnCl<sub>2</sub>, 400 μg/L FeCl<sub>3</sub>·6H<sub>2</sub>O, 20 μg/L CuCl<sub>2</sub>·2H<sub>2</sub>O, 20 μg/L MnCl<sub>2</sub>·4H<sub>2</sub>O, 20 μg/L Na<sub>2</sub>B<sub>4</sub>O<sub>7</sub>·10H<sub>2</sub>O, 20 μg/L (NH<sub>4</sub>)<sub>6</sub>Mo<sub>7</sub>O<sub>24</sub>·4H<sub>2</sub>O, 50 mg/L KH<sub>2</sub>PO<sub>4</sub>, 3 g/L L-proline, 2.94 g/L CaCl<sub>2</sub>, and 280 μg/L NaOH).

After 7 days of incubation at 28 °C, 50 mL of EtOAc was added, the mixture was sonicated in a sonication bath for 5 min, and the EtOAc layer was recovered. After drying the organic layer under anhydrous MgSO<sub>4</sub>, the solvent was evaporated under reduced pressure. The residue was dissolved in 1 mL of MeCN, and the solution was filtered through a C<sub>18</sub> sorbent (Spice C18 Sample Preparation Cartridges, Analtech, Inc., Newark, NJ). The filtrate was evaporated under reduced pressure in a 14-mL scintillation vial, and the residue was stored at -20 °C until HPLC analysis.

The residue was dissolved in 100 μL of MeCN, and 10 μL of the dissolved residue was injected onto a reversed-phase HPLC column (Phenomenex Luna C18(2), 4.6 × 100 mm, 5 μm). The following solvent composition was used to separate the analytes: 50-100% MeCN in H<sub>2</sub>O for 20 min, 100% MeCN in H<sub>2</sub>O for 5 min, 100-50% MeCN in H<sub>2</sub>O for 1.5 min, and 50% MeCN in H<sub>2</sub>O for 2.5 min. HR-MS data were acquired using positive-mode HPLC-HR-APCI-MS.

**Table S1.** NMR Spectral Data for Merochlorin A (**1**) in DMSO-*d*<sub>6</sub>.<sup>a</sup>

| No.  | $\delta_c$ , mult. <sup>b</sup> | $\delta_H$ ( <i>J</i> in Hz)               | COSY   | HMBC                            |
|------|---------------------------------|--------------------------------------------|--------|---------------------------------|
| 1    | 193.2, qC                       |                                            |        |                                 |
| 2    | 109.8, qC                       |                                            |        |                                 |
| 3    | 165.4, qC                       |                                            |        |                                 |
| 4    | 102.1, CH                       | 6.16, d (2.0)                              | 6      | C-1, 2, 3, 5, 6                 |
| 5    | 166.5, qC                       |                                            |        |                                 |
| 6    | 103.7, CH                       | 6.38, d (2.0)                              | 4      | C-1, 2, 4, 5, 7, 8              |
| 7    | 150.5, qC                       |                                            |        |                                 |
| 8    | 61.5, qC                        |                                            |        |                                 |
| 9    | 58.8, CH                        | 2.24, dd (9.4, 4.0)                        | 15     | C-7, 10, 11, 12, 14, 15, 16, 25 |
| 10   | 45.3, qC                        |                                            |        |                                 |
| 11   | 91.3, qC                        |                                            |        |                                 |
| 12   | 200.1, qC                       |                                            |        |                                 |
| 13   | 29.3, CH <sub>2</sub>           | 2.87, d (13.0); 2.65, d (13.0)             |        | C-7, 8, 9, 12, 14, 15, 23       |
| 14   | 132.1, qC                       |                                            |        |                                 |
| 15   | 31.9, CH <sub>2</sub>           | 2.36, dd (14.0, 4.0); 2.33, dd (14.0, 9.4) | 9      | C-8, 9, 10, 13, 14, 23          |
| 16   | 39.2, CH <sub>2</sub>           | 1.14, q (6.0); 1.40, dt (14.8, 4.8)        | 17     | C-8, 9, 10, 11, 17, 25          |
| 17   | 22.8, CH <sub>2</sub>           | 2.03, m; 1.75, m                           | 16, 18 | C-10, 16, 18, 19                |
| 18   | 124.2, CH                       | 4.92, t (6.5)                              | 17     | C-16, 17, 19, 20, 21            |
| 19   | 131.6, qC                       |                                            |        |                                 |
| 20   | 18.1, CH <sub>3</sub>           | 1.45, s                                    |        | C-18, 19, 21                    |
| 21   | 26.1, CH <sub>3</sub>           | 1.53, s                                    |        | C-18, 19, 20                    |
| 22   | 20.9, CH <sub>3</sub>           | 1.56, s                                    |        | C-14, 23, 24                    |
| 23   | 123.1, qC                       |                                            |        |                                 |
| 24   | 21.1, CH <sub>3</sub>           | 1.65, s                                    |        | C-14, 22, 23                    |
| 25   | 16.5, CH <sub>3</sub>           | 0.81, s                                    |        | C-9, 10, 11, 16                 |
| 3-OH |                                 | 11.9, br s                                 |        |                                 |

<sup>a</sup> <sup>1</sup>H NMR (600 MHz) and <sup>13</sup>C NMR (150 MHz). <sup>b</sup> The number of attached protons (multiplicity) was determined by 2D NMR data analysis.

**Table S2.** NMR Spectral Data for Merochlorin B (**2**) in DMSO-*d*<sub>6</sub>.<sup>a</sup>

| No.  | $\delta_C$ , mult. <sup>b</sup> | $\delta_H$ ( <i>J</i> in Hz)   | COSY   | HMBC                           |
|------|---------------------------------|--------------------------------|--------|--------------------------------|
| 1    | 184.0, qC                       |                                |        |                                |
| 2    | 106.4, qC                       |                                |        |                                |
| 3    | 163.7, qC                       |                                |        |                                |
| 4    | 101.9, CH                       | 6.17, d (2.0)                  | 6      | C-2, 3, 5, 6                   |
| 5    | 163.0, qC                       |                                |        |                                |
| 6    | 104.4, CH                       | 6.15, d (2.0)                  | 4      | C-2, 4, 5, 7, 8                |
| 7    | 148.4, qC                       |                                |        |                                |
| 8    | 60.7, qC                        |                                |        |                                |
| 9    | 52.5, CH                        | 2.99, d (7.8)                  | 15     | C-7, 8, 10, 13, 14, 15, 16, 25 |
| 10   | 98.6, qC                        |                                |        |                                |
| 11   | 174.0, qC                       |                                |        |                                |
| 12   | 99.8, qC                        |                                |        |                                |
| 13   | 49.8, CH <sub>2</sub>           | 2.81, d (17.0); 2.47, d (17.0) |        | C-7, 8, 9, 11, 13, 14, 15, 23  |
| 14   | 131.0, qC                       |                                |        |                                |
| 15   | 35.3, CH <sub>2</sub>           | 2.82, d (17.8); 2.70, d (17.8) | 9      | C- 9, 10, 13, 14, 23           |
| 16   | 42.9, CH <sub>2</sub>           | 1.73-1.74, m                   | 17     | C- 9, 10, 25                   |
| 17   | 22.6, CH <sub>2</sub>           | 1.99, m; 1.74, m               | 16, 18 | C-10, 16, 18, 19               |
| 18   | 124.5, CH                       | 5.05, t (7.5)                  | 17     | C-16, 17, 19, 20, 21           |
| 19   | 131.4, qC                       |                                |        |                                |
| 20   | 18.1, CH <sub>3</sub>           | 1.48, s                        |        | C-18, 19, 21                   |
| 21   | 25.6, CH <sub>3</sub>           | 1.57, s                        |        | C-18, 19, 20                   |
| 22   | 21.9, CH <sub>3</sub>           | 1.70, s                        |        | C-14, 23, 24                   |
| 23   | 126.2, qC                       |                                |        |                                |
| 24   | 17.0, CH <sub>3</sub>           | 1.62, s                        |        | C-14, 22, 23                   |
| 25   | 22.6, CH <sub>3</sub>           | 1.41, s                        |        | C-9, 10, 16                    |
| 3-OH |                                 | 12.9, br s                     |        | C-1, 2, 3, 4                   |

<sup>a</sup> <sup>1</sup>H NMR (500 MHz) and <sup>13</sup>C NMR (125 MHz). <sup>b</sup> The number of attached protons (multiplicity) was determined by 2D NMR data analysis.

**Table S3.** NMR Spectral Data for Merochlorins C (**3**) and D (**4**) in DMSO-*d*<sub>6</sub>.<sup>a</sup>

| No.   | <b>3</b>                                 |                                            | <b>4</b>                                 |                                       |
|-------|------------------------------------------|--------------------------------------------|------------------------------------------|---------------------------------------|
|       | $\delta_{\text{C}}$ , mult. <sup>b</sup> | $\delta_{\text{H}}$ ( <i>J</i> in Hz)      | $\delta_{\text{C}}$ , mult. <sup>b</sup> | $\delta_{\text{H}}$ ( <i>J</i> in Hz) |
| 1     | 195.9, C                                 |                                            | 196.4, C                                 |                                       |
| 2     | 135.7, C                                 |                                            | 136.2, C                                 |                                       |
| 3     | 108.1, CH                                | 6.83, d (2.0)                              | 110.6, CH                                | 7.19, d (2.0)                         |
| 4     | 166.0, C                                 |                                            | 159.0, C                                 |                                       |
| 5     | 108.4, CH                                | 6.60, d (2.0)                              | 118.9, CH                                | 6.91, d (2.0)                         |
| 6     | 165.0, C                                 |                                            | 164.0, C                                 |                                       |
| 7     | 108.6, C                                 |                                            | 118.8, C                                 |                                       |
| 8     | 194.1, C                                 |                                            | 187.1, C                                 |                                       |
| 9     | 77.0, C                                  |                                            | 78.0, C                                  |                                       |
| 10    | 84.5, C                                  |                                            | 84.2, C                                  |                                       |
| 11    | 39.0, CH <sub>2</sub>                    | 2.42, d (16.0); 2.24, d (16.0)             | 38.2, CH <sub>2</sub>                    | 2.88, d (16.0); 2.11, d (16.0)        |
| 12    | 126.5, C                                 |                                            | 124.5, C                                 |                                       |
| 13    | 31.1, CH <sub>2</sub>                    | 2.82, dd (14.0, 6.0); 2.35, dd (14.0, 6.0) | 30.5, CH <sub>2</sub>                    | 2.79, d (14.0); 1.81 d (14.0)         |
| 14    | 123.1, CH                                | 4.77, t (6.0)                              | 124.9, CH                                | 4.36, t (6.5)                         |
| 15    | 134.9, C                                 |                                            | 135.1, C                                 |                                       |
| 16    | 39.6, CH <sub>2</sub>                    | 1.84, m                                    | 35.8, CH <sub>2</sub>                    | 1.96, m                               |
| 17    | 26.7, CH <sub>2</sub>                    | 1.95, m                                    | 31.8, CH <sub>2</sub>                    | 1.61, m; 1.54, m                      |
| 18    | 124.6, CH                                | 4.97, t (6.0)                              | 66.4, CH                                 | 3.84, d (10.2)                        |
| 19    | 131.3, C                                 |                                            | 87.8, C                                  |                                       |
| 20    | 26.8, CH <sub>3</sub>                    | 1.59, s                                    | 25.4, CH <sub>3</sub>                    | 1.58, s                               |
| 21    | 18.8, CH <sub>3</sub>                    | 1.51, s                                    | 30.5, CH <sub>3</sub>                    | 1.70, s                               |
| 22    | 21.0, CH <sub>3</sub>                    | 1.47, s                                    | 22.6, CH <sub>3</sub>                    | 1.76, s                               |
| 23    | 130.3, C                                 |                                            | 132.5, C                                 |                                       |
| 24    | 21.3, CH <sub>3</sub>                    | 1.08, s                                    | 21.1, CH <sub>3</sub>                    | 1.59, s                               |
| 25    | 16.8, CH <sub>3</sub>                    | 1.42, s                                    | 16.5, CH <sub>3</sub>                    | 0.98, s                               |
| 26    | 18.9, CH <sub>3</sub>                    | 1.77, s                                    | 19.9, CH <sub>3</sub>                    | 1.74, s                               |
| 6-OH  |                                          | 11.5, s                                    |                                          | 11.2, s                               |
| 10-OH |                                          | 6.09, s                                    |                                          | 5.82, br s                            |

<sup>a</sup> <sup>1</sup>H NMR (500 MHz) and <sup>13</sup>C NMR (125 MHz). <sup>b</sup> The number of attached protons (multiplicity) was determined by 2D NMR data analysis.

**Table S4.** Representative MIC Values for Merochlorins A-D (1–4) against MRSA. Assay set up was as previously described.<sup>3</sup>

|                 | MIC ( $\mu\text{g/mL}$ ) |   |     |     |
|-----------------|--------------------------|---|-----|-----|
|                 | 1                        | 2 | 3   | 4   |
| TCH1516 (CA)    | 4                        | 4 | n.d | n.d |
| UAMS1182 (CA)   | 2                        | 4 | 16  | n.d |
| Sanger 252 (HA) | 4                        | 4 | n.d | n.d |
| ATCC33591 (HA)  | 2                        | 8 | 16  | >64 |

**Table S5. PCR Primers.**

| Primer name              | Primer sequence, 5' → 3' <sup>a</sup>                               |
|--------------------------|---------------------------------------------------------------------|
| pksIII_fwd               | CCCATCGCSCAGCTGGGCTGCGCGGC                                          |
| pksIII_rev               | GGACGACGGCGCTGGCGATG                                                |
| mcl17-fwd <sup>a</sup>   | <i>ATAGAAGGCAGACCTAGAGAAAGTAGACCCCAGACATGATTCCGGGGATCCGTCGACC</i>   |
| mcl17-rev <sup>a</sup>   | <i>GCTTCCGTCCGTGGCCGGGCGGCACGATGAGGCCAGTCATGTAGGCTGGAGCTCCTTC</i>   |
| int-fwd <sup>a</sup>     | <i>GAGTTATCGAGATTTTCAGGAGCTAAGGAAGCTAAAATGTGCTACAGAGTTCTTGAAGTG</i> |
| int-rev <sup>a</sup>     | <i>AGGCGTTTAAGGGCACCAATAACTGCCTTAAAAAATTATCGATCAGAACTTCTCGACA</i>   |
| apEXkan_fwd <sup>b</sup> | <i>CATGAGATTATCAAAAAGGATCTTCACCTGATCCTTTCCGGAATTGCCAGCTGGGG</i>     |
| apEXkan_rev <sup>b</sup> | <i>CCTTGCCCTCCAACGTCATCTCGTTCTCCGCTCATGAGCTCAGAAGAACTCGTCAAG</i>    |

<sup>a</sup> The italicized letters represent 39-nt sequences that allow homologous recombination with the targeted region of a fosmid (this technique is called PCR-targeted mutagenesis).

<sup>b</sup> The italicized letters represent regions that overlap with the *aac(3)IV* gene.

**Table S6.** Gene Table. Homologous genes and proposed function of genes in the merochlorin gene cluster

| Gene         | AA  | Protein homolog                                  | Accession number | ID/sim. <sup>a</sup> | Proposed function                    |
|--------------|-----|--------------------------------------------------|------------------|----------------------|--------------------------------------|
| <i>mcl1</i>  | 285 | Lct19, <i>S. rishiriensis</i>                    | ABX71102         | 81/88                | methylenetetrahydrofolate reductase  |
| <i>mcl2</i>  | 357 | Fnq23, <i>S. cinnamomensis</i>                   | CAL34101         | 73/82                | trans-isoprenyl diphosphate synthase |
| <i>mcl3</i>  | 325 | Fur15, <i>Streptomyces</i> sp. KO-3988           | BAD86806         | 74/85                | ketoacyl-ACP synthase III            |
| <i>mcl4</i>  | 391 | LpmA, <i>Streptomyces</i> sp. SN-1061M           | ADC96649         | 83/91                | HMG-CoA synthase                     |
| <i>mcl5</i>  | 353 | Hmgr, <i>S. cinnamomensis</i>                    | ADQ43377         | 90/95                | HMG-CoA reductase                    |
| <i>mcl6</i>  | 364 | IPPiso, <i>S. cinnamomensis</i>                  | ADQ43376         | 81/89                | isopentenyl diphosphate isomerase    |
| <i>mcl7</i>  | 370 | Pmk, <i>S. cinnamomensis</i>                     | ADQ43375         | 69/77                | phosphomevalonate kinase             |
| <i>mcl8</i>  | 346 | Mdpd, <i>S. cinnamomensis</i>                    | ADQ43374         | 76/83                | mevalonate diphosphate decarboxylase |
| <i>mcl9</i>  | 345 | Mk, <i>S. cinnamomensis</i>                      | ADQ43373         | 70/81                | mevalonate kinase                    |
| <i>mcl10</i> | 62  | SACTE_6317, <i>Streptomyces</i> sp. SirexAA-E    | YP_004806629     | 47/56                | MerR-like transcriptional regulator  |
| <i>mcl11</i> | 209 | NapU1, <i>S. aculeolatus</i>                     | ABS50449         | 58/72                | hypothetical protein                 |
| <i>mcl12</i> | 673 | Fur16, <i>Streptomyces</i> sp. KO-3988           | BAE78984         | 55/63                | NAD(P)-binding oxidoreductase        |
| <i>mcl13</i> | 479 | Fur17, <i>Streptomyces</i> sp. KO-3988           | BAE78985         | 61/70                | 3-carboxymuconate cycloisomerase     |
| <i>mcl14</i> | 513 | Fnq24, <i>S. cinnamomensis</i>                   | CAL34102         | 65/75                | FAD-dependent oxidoreductase         |
| <i>mcl15</i> | 566 | Fnq25, <i>S. cinnamomensis</i>                   | CAL34103         | 73/87                | cytochrome B                         |
| <i>mcl16</i> | 119 | SrosN1_05685, <i>S. roseosporus</i><br>NRRL11379 | ZP_04707445      | 36/49                | hypothetical protein                 |
| <i>mcl17</i> | 358 | NapB1, <i>S. aculeolatus</i>                     | ABS50451         | 71/83                | type III polyketide (THN) synthase   |
| <i>mcl18</i> | 186 | NapB2, <i>S. aculeolatus</i>                     | ABS50452         | 71/83                | THN monooxygenase                    |
| <i>mcl19</i> | 388 | Fur3, <i>Streptomyces</i> sp. KO-3988            | BAE78971         | 77/87                | aminotransferase                     |
| <i>mcl20</i> | 528 | NapB4, <i>S. aculeolatus</i>                     | ABS50453         | 81/89                | acyl-CoA synthetase                  |
| <i>mcl21</i> | 377 | Fur6, <i>Streptomyces</i> sp. KO-3988            | BAE78974         | 79/88                | C-methyltransferase                  |

|                         |     |                                        |             |       |                                        |
|-------------------------|-----|----------------------------------------|-------------|-------|----------------------------------------|
| <i>mcl22</i>            | 217 | Orf55, <i>S. fradiae</i>               | AAZ23097    | 25/47 | undecaprenyl diphosphate synthase      |
| <i>mcl23</i>            | 305 | NapT9, <i>S. aculeolatus</i>           | ABS50462    | 41/62 | prenyltransferase                      |
| <i>mcl24</i>            | 517 | NapH1, <i>S. aculeolatus</i>           | ABS50458    | 53/69 | vanadium-dependent haloperoxidase      |
| <i>mcl25</i>            | 520 | Pur8, <i>S. anulatus</i>               | CAA54186    | 42/60 | MFS-like transporter                   |
| <i>mcl26</i>            | 317 | SsfY1, <i>Streptomyces</i> sp. CSF2575 | ADE34490    | 38/57 | aromatase                              |
| <i>mcl27</i>            | 240 | GrhD, <i>Streptomyces</i> sp. JP95     | AAM33656    | 41/50 | thioesterase                           |
| <i>mcl28</i>            | 273 | FarR3, <i>S. lavendulae</i>            | BAG74713    | 79/88 | SARP-like transcriptional regulator    |
| <i>mcl29</i>            | 222 | TylQ, <i>S. fradiae</i>                | AAD40803    | 52/65 | TetR-like transcriptional regulator    |
| <i>mcl30</i>            | 772 | SSFG_03404, <i>S. ghanaensis</i>       | ZP_06577698 | 84/89 | iron-sulfur-binding oxidoreductase     |
| <i>mcl31</i>            | 289 | FarR4, <i>S. lavendulae</i>            | BAG74714    | 69/76 | SARP-like transcriptional regulator    |
| <i>mcl32</i>            | 215 | Lct13, <i>S. rishiriensis</i>          | ABX71096    | 53/65 | TetR-like transcriptional regulator    |
| <i>mcl33</i>            | 485 | AlpM, <i>S. ambofaciens</i>            | AAR30157    | 51/60 | NRPS condensation domain               |
| <i>mcl34</i>            | 313 | VmsS, <i>S. virginiae</i>              | BAF50715    | 55/64 | SARP-like transcriptional regulator    |
| <i>mcl35</i>            | 271 | Fnq4, <i>S. cinnamomensis</i>          | CAL34082    | 57/70 | SARP-like transcriptional regulator    |
| <i>mcl36</i>            | 280 | FarR4, <i>S. lavendulae</i>            | BAG74714    | 67/77 | SARP-like transcriptional regulator    |
| <i>mcl37</i>            | 330 | SagA, <i>S. aurefaciens</i>            | ADM72848    | 50/59 | AfsA-like gamma-butyrolactone synthase |
| <i>mcl38</i>            | 254 | JadW3, <i>S. venezuelae</i>            | AAL23836    | 65/69 | NAD(P)-binding reductase               |
| <i>mcl39</i>            | 531 | NapR5, <i>S. aculeolatus</i>           | ABS50467    | 66/79 | MFS-like transporter                   |
| <i>mcl40</i>            | 531 | NapH4, <i>S. aculeolatus</i>           | ABS50464    | 66/80 | vanadium-dependent haloperoxidase      |
| <i>mcl41</i>            | 240 | SCO1940, <i>S. coelicolor</i> A3(2)    | NP_626205   | 54/64 | thioredoxin-like oxidoreductase        |
| <i>orf1<sup>b</sup></i> | 161 | SSNG_06381, <i>Streptomyces</i> sp. C  | ZP_07290760 | 48/59 | SARP-like transcriptional regulator    |

<sup>a</sup> Overall sequence homology [%]

<sup>b</sup> Gene is considered incomplete on fosmid PB6B10



**Figure S1.**  $^1\text{H}$  NMR Spectrum (600 MHz) of Merochlorin A (**1**) in  $\text{DMSO-}d_6$

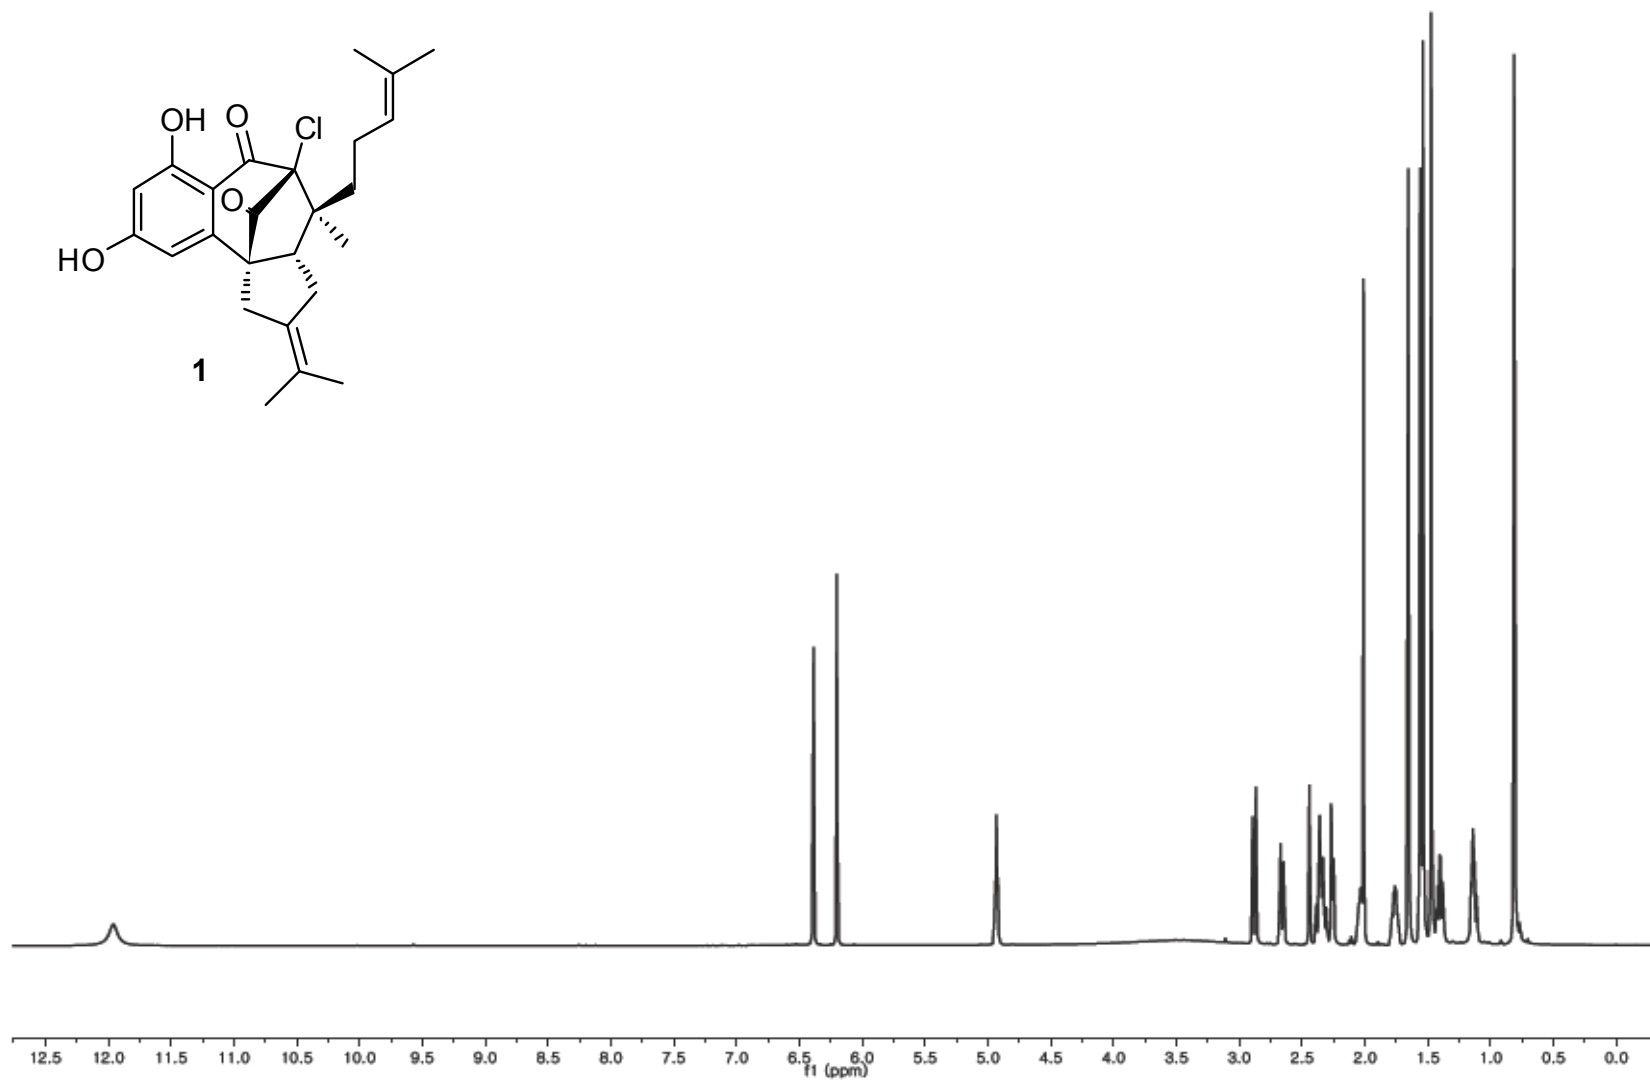

**Figure S2.**  $^{13}\text{C}$  NMR Spectrum (150 MHz) of Merochlorin A (**1**) in  $\text{DMSO-}d_6$

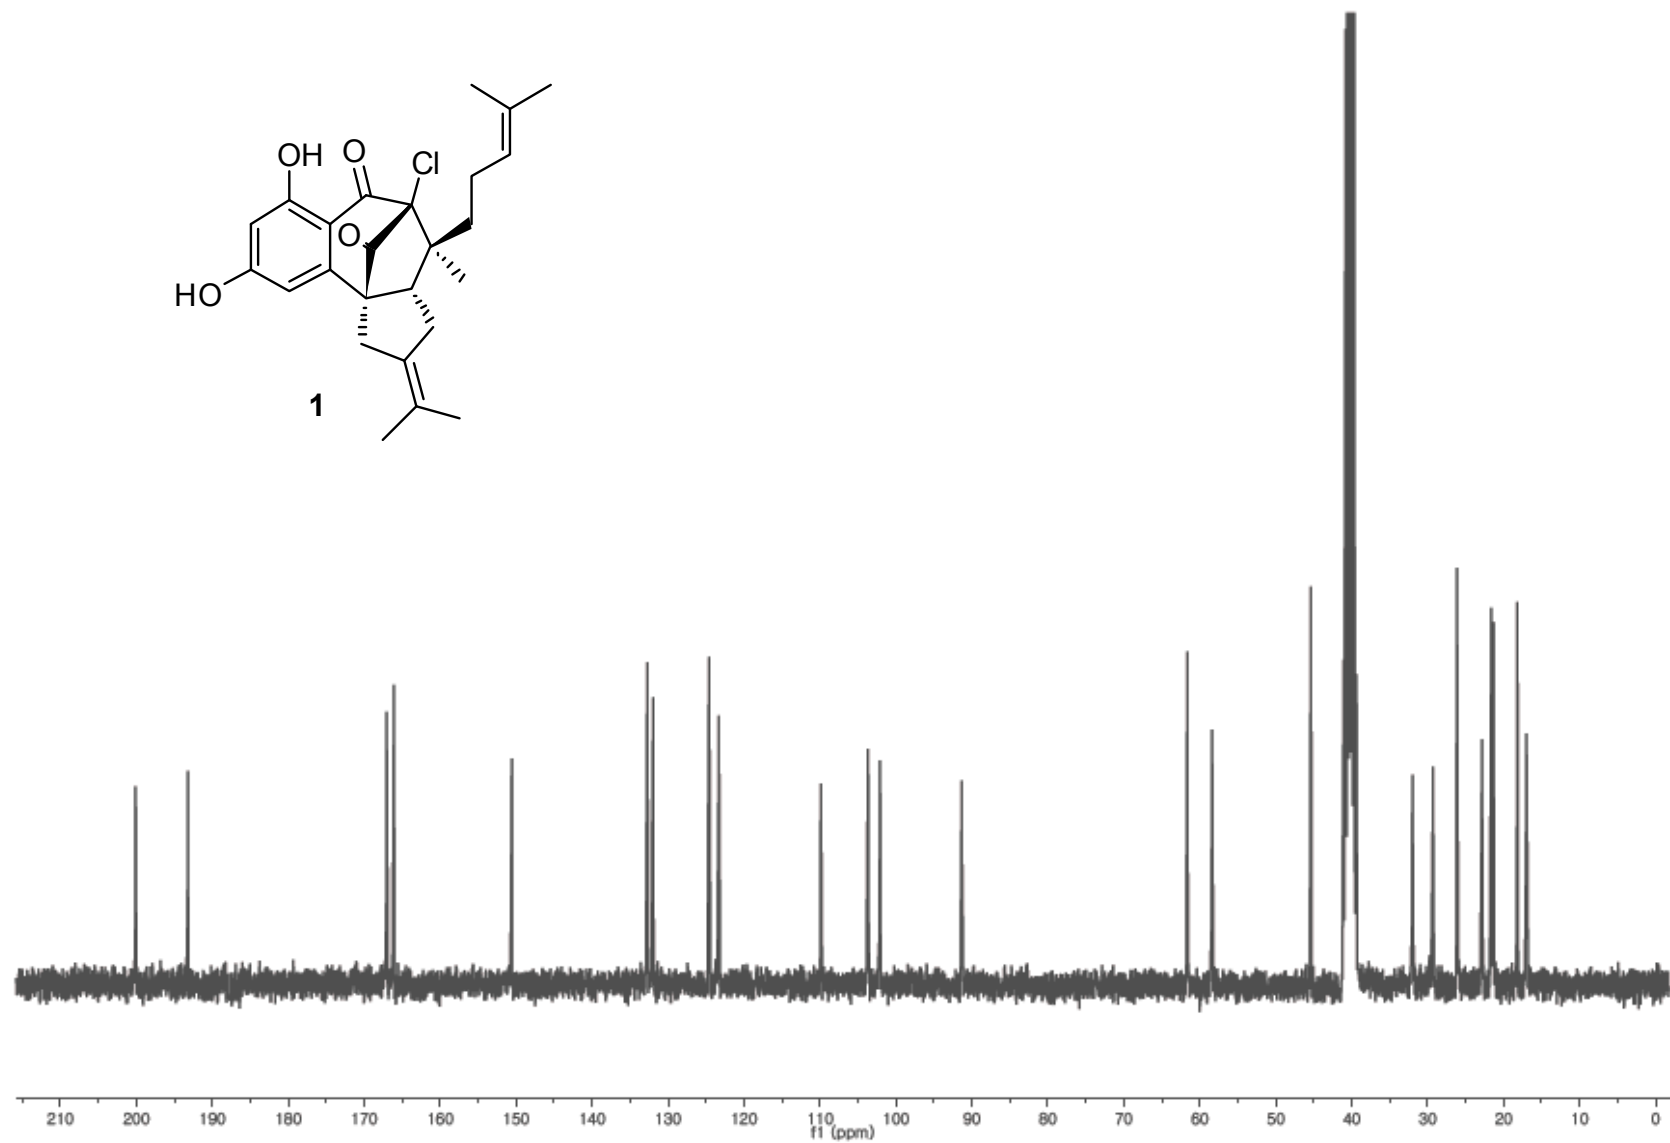

**Figure S3.** COSY Spectrum (600 MHz) of Merochlorin A (**1**) in DMSO- $d_6$

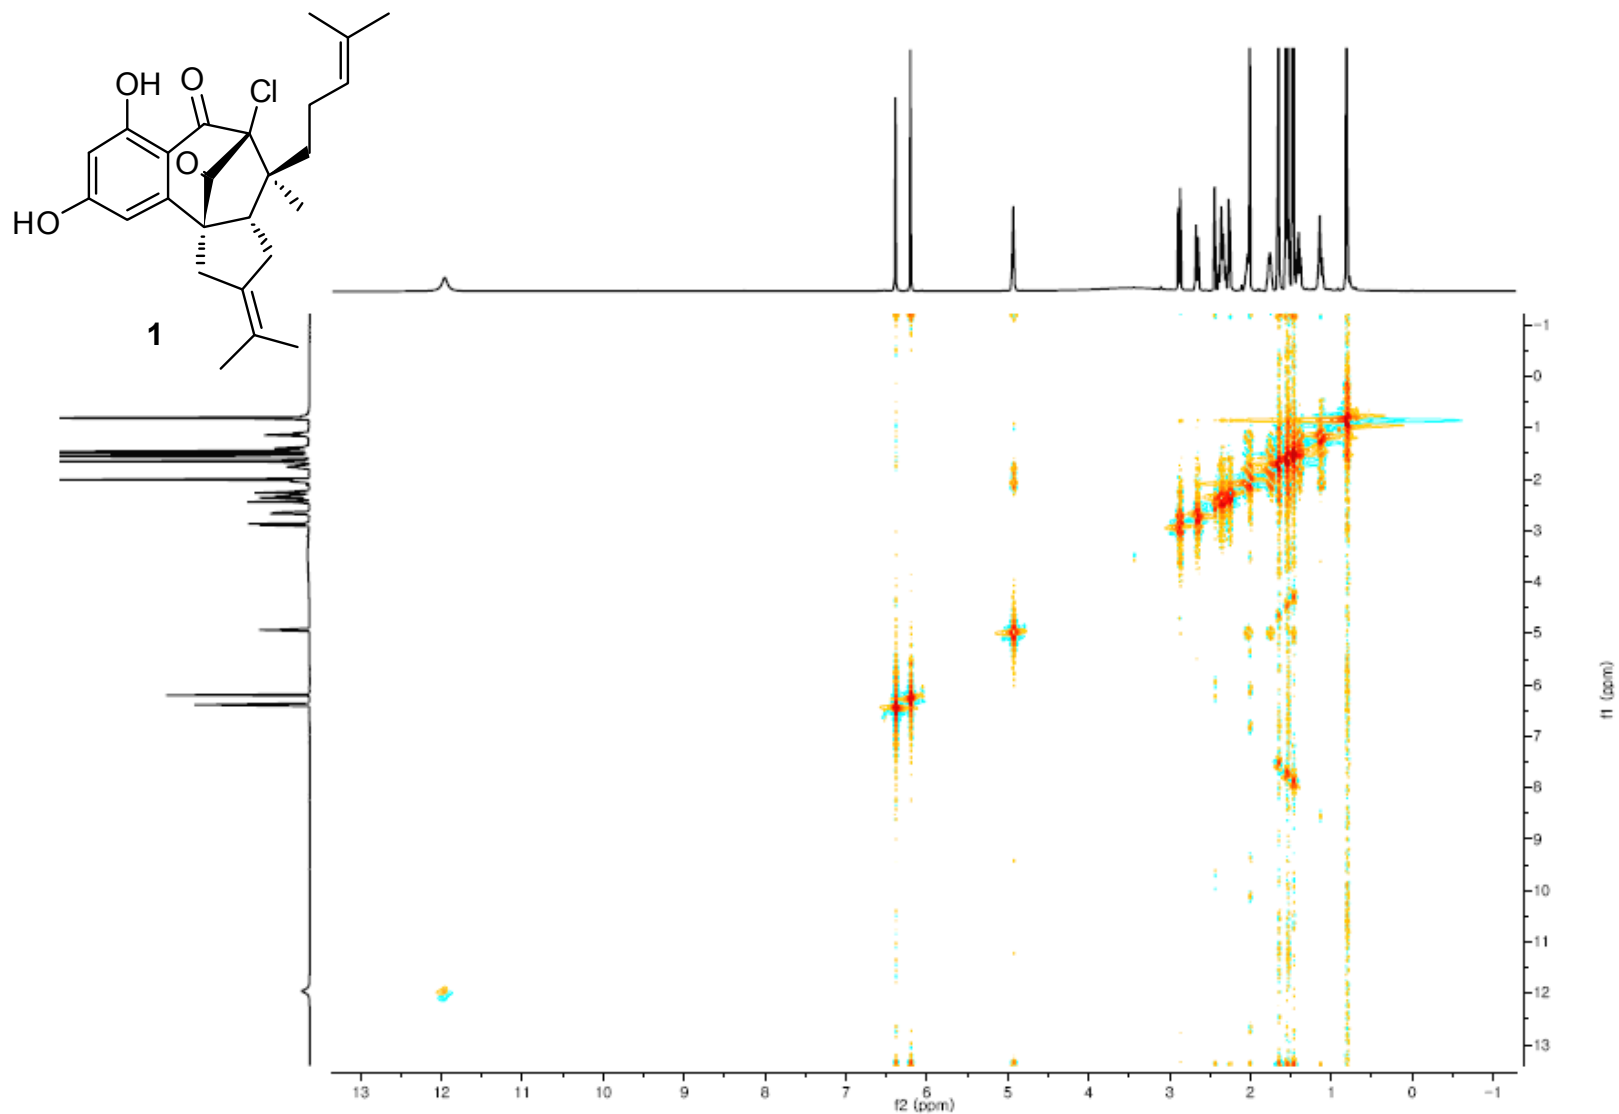

**Figure S4.** HSQC Spectrum (600 MHz) of Merochlorin A (**1**) in DMSO-*d*<sub>6</sub>

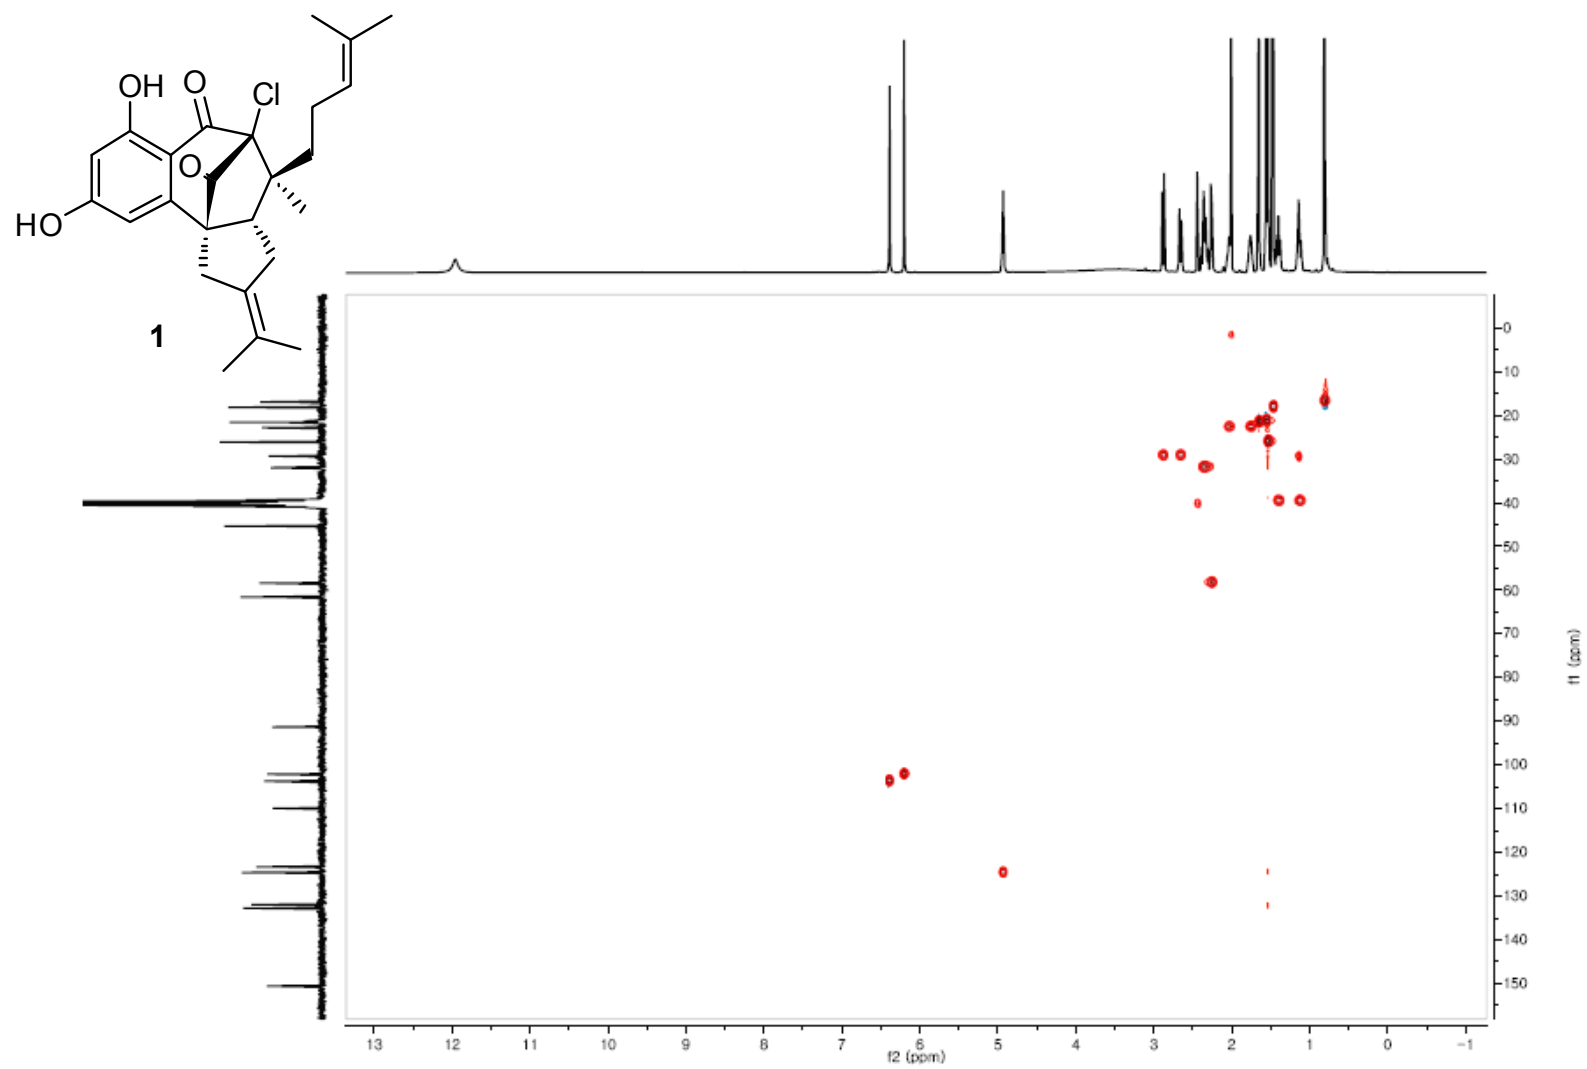

**Figure S5.** HMBC Spectrum (600 MHz) of Merochlorin A (**1**) in DMSO- $d_6$

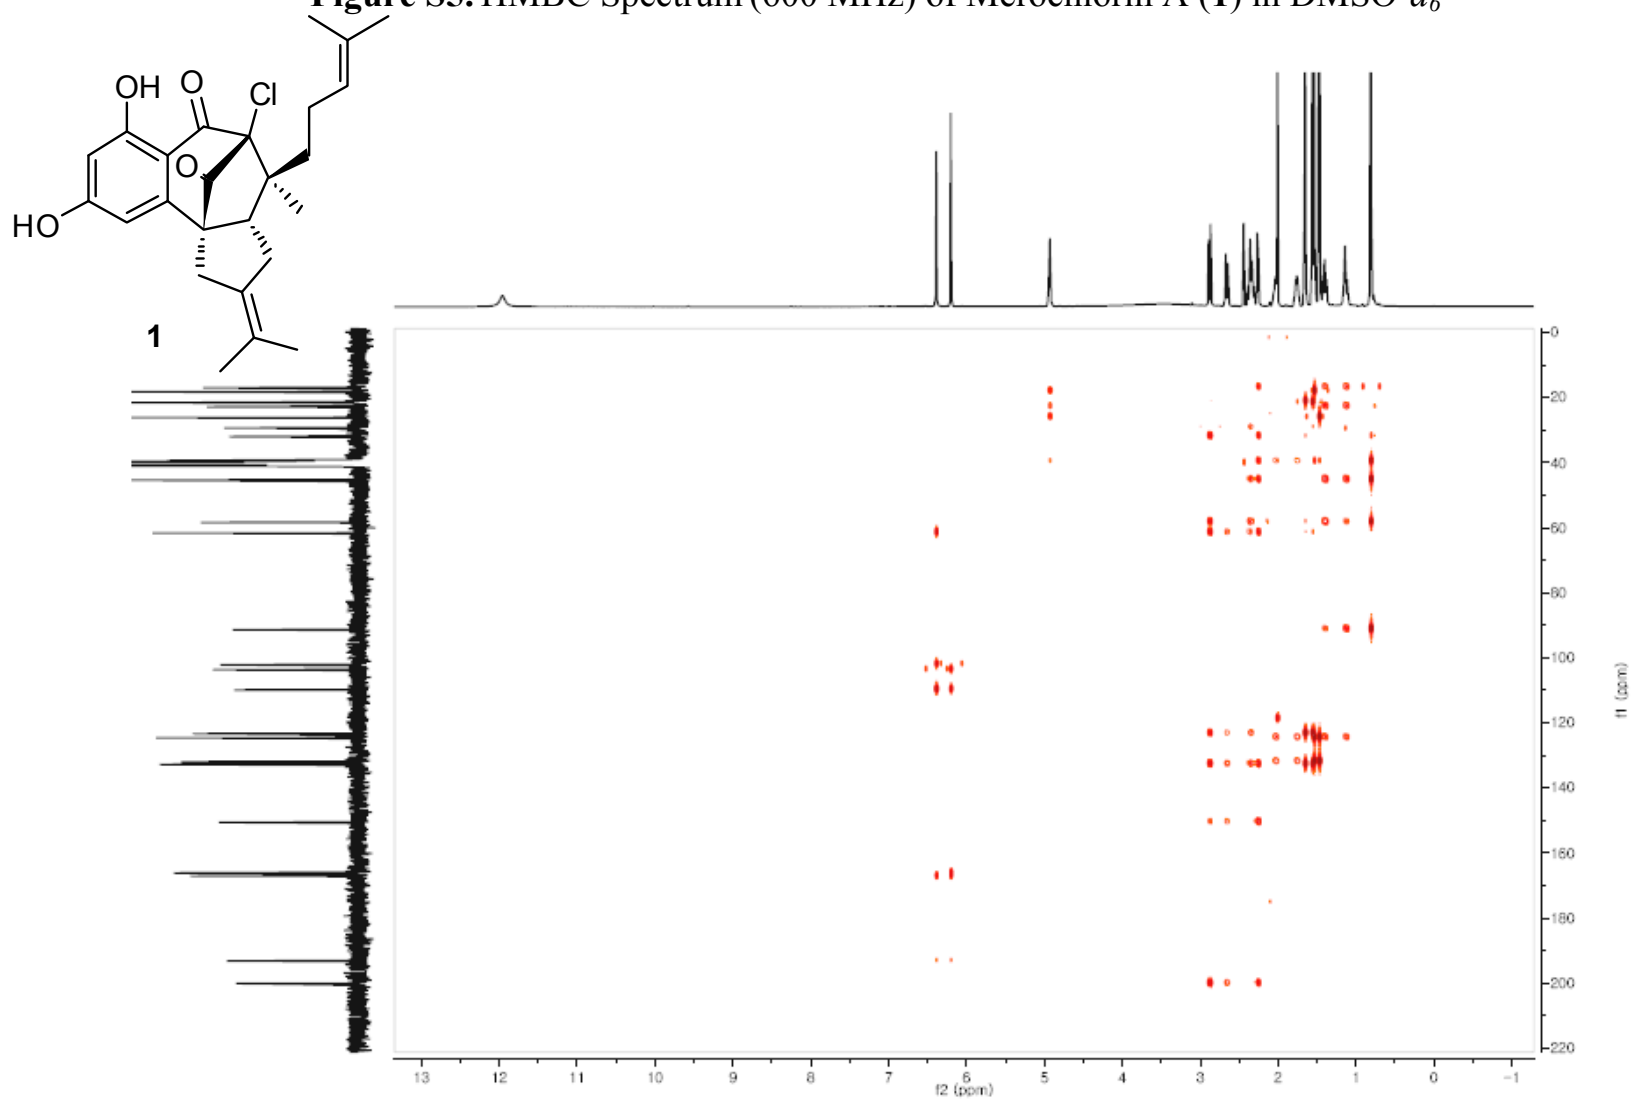

**Figure S6.** ROESY Spectrum (600 MHz) of Merochlorin A (**1**) in DMSO-*d*<sub>6</sub>

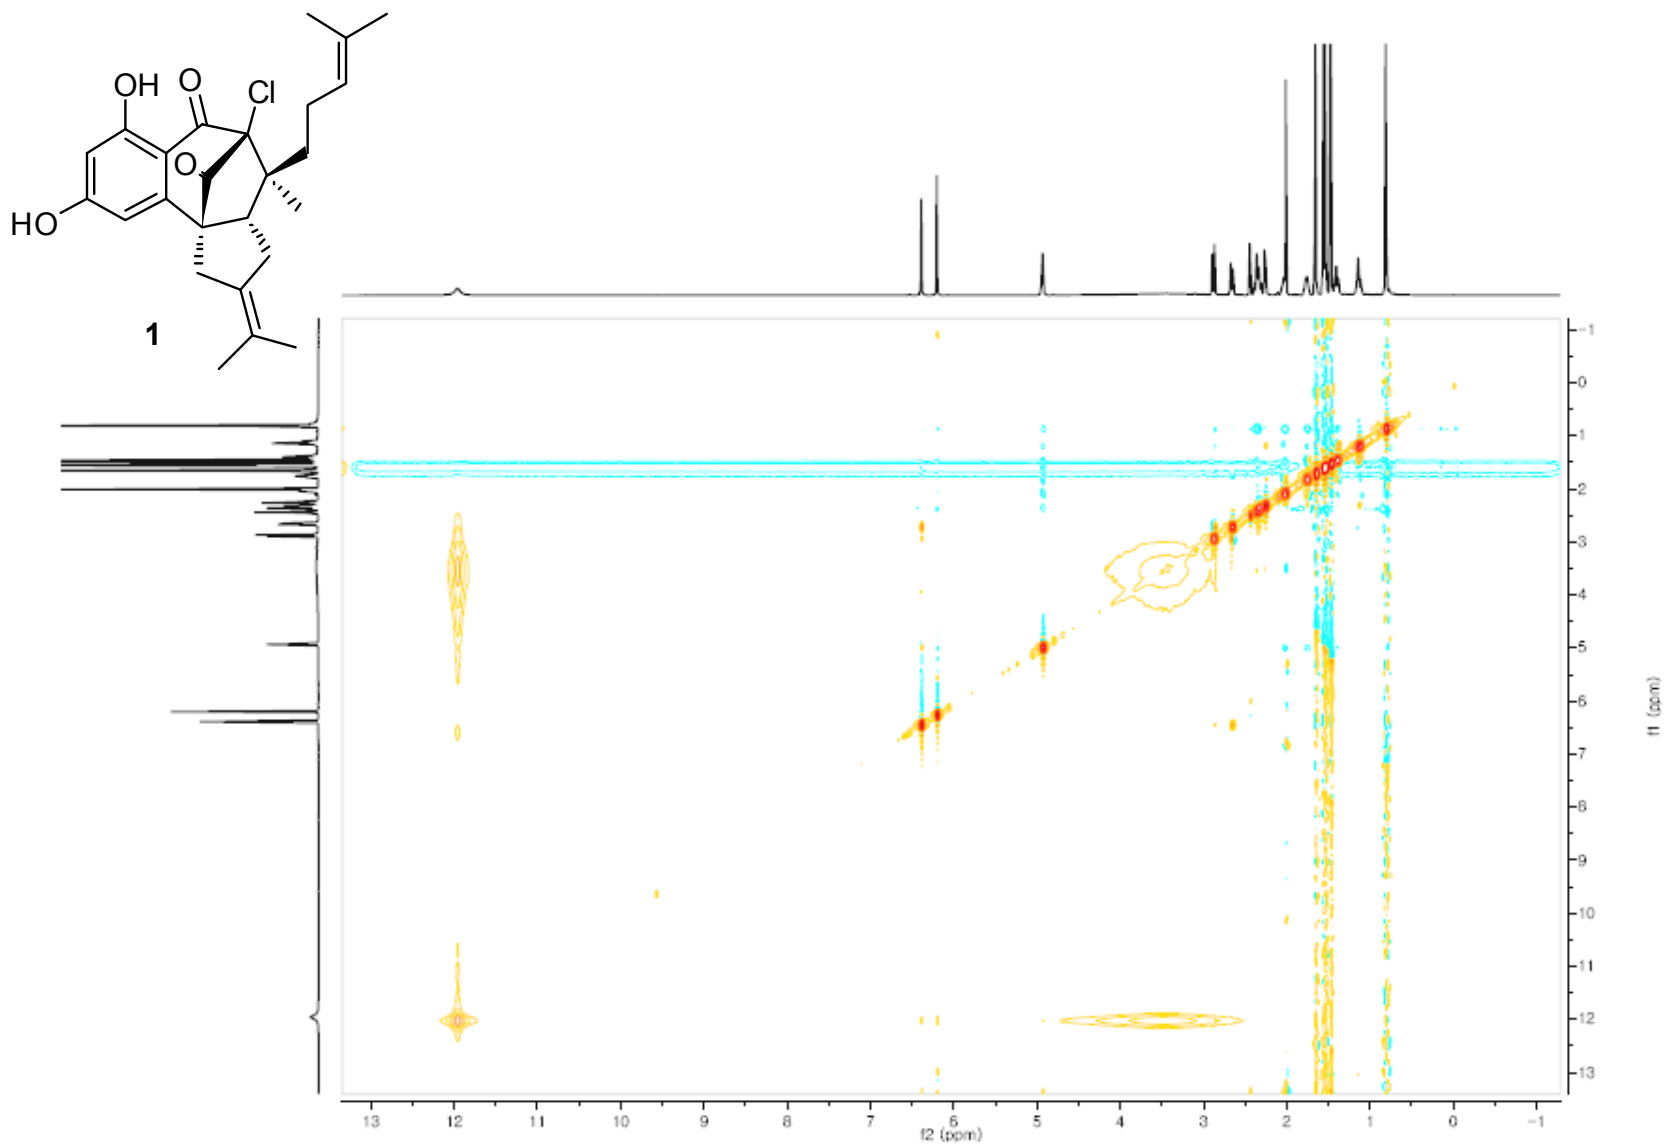

**Figure S7.**  $^1\text{H}$  NMR Spectrum (600 MHz) of Merochlorin B (**2**) in  $\text{DMSO-}d_6$

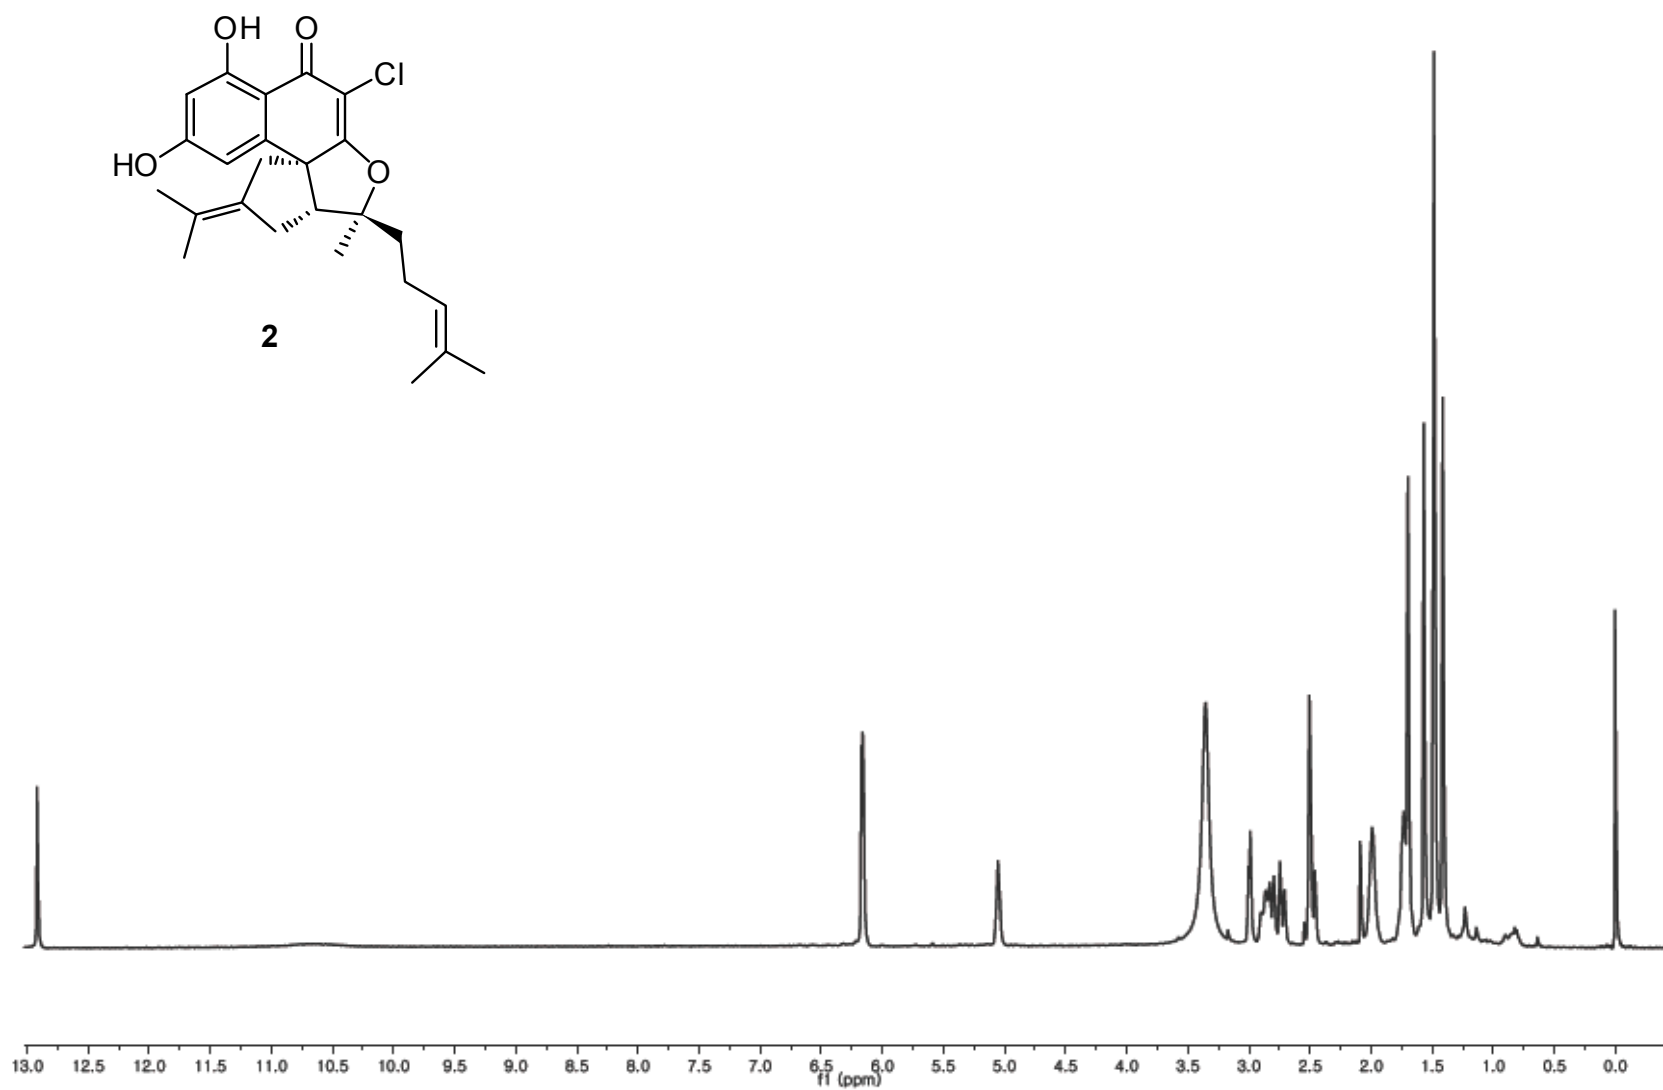

**Figure S8.**  $^{13}\text{C}$  NMR Spectrum (125 MHz) of Merochlorin B (**2**) in  $\text{DMSO-}d_6$

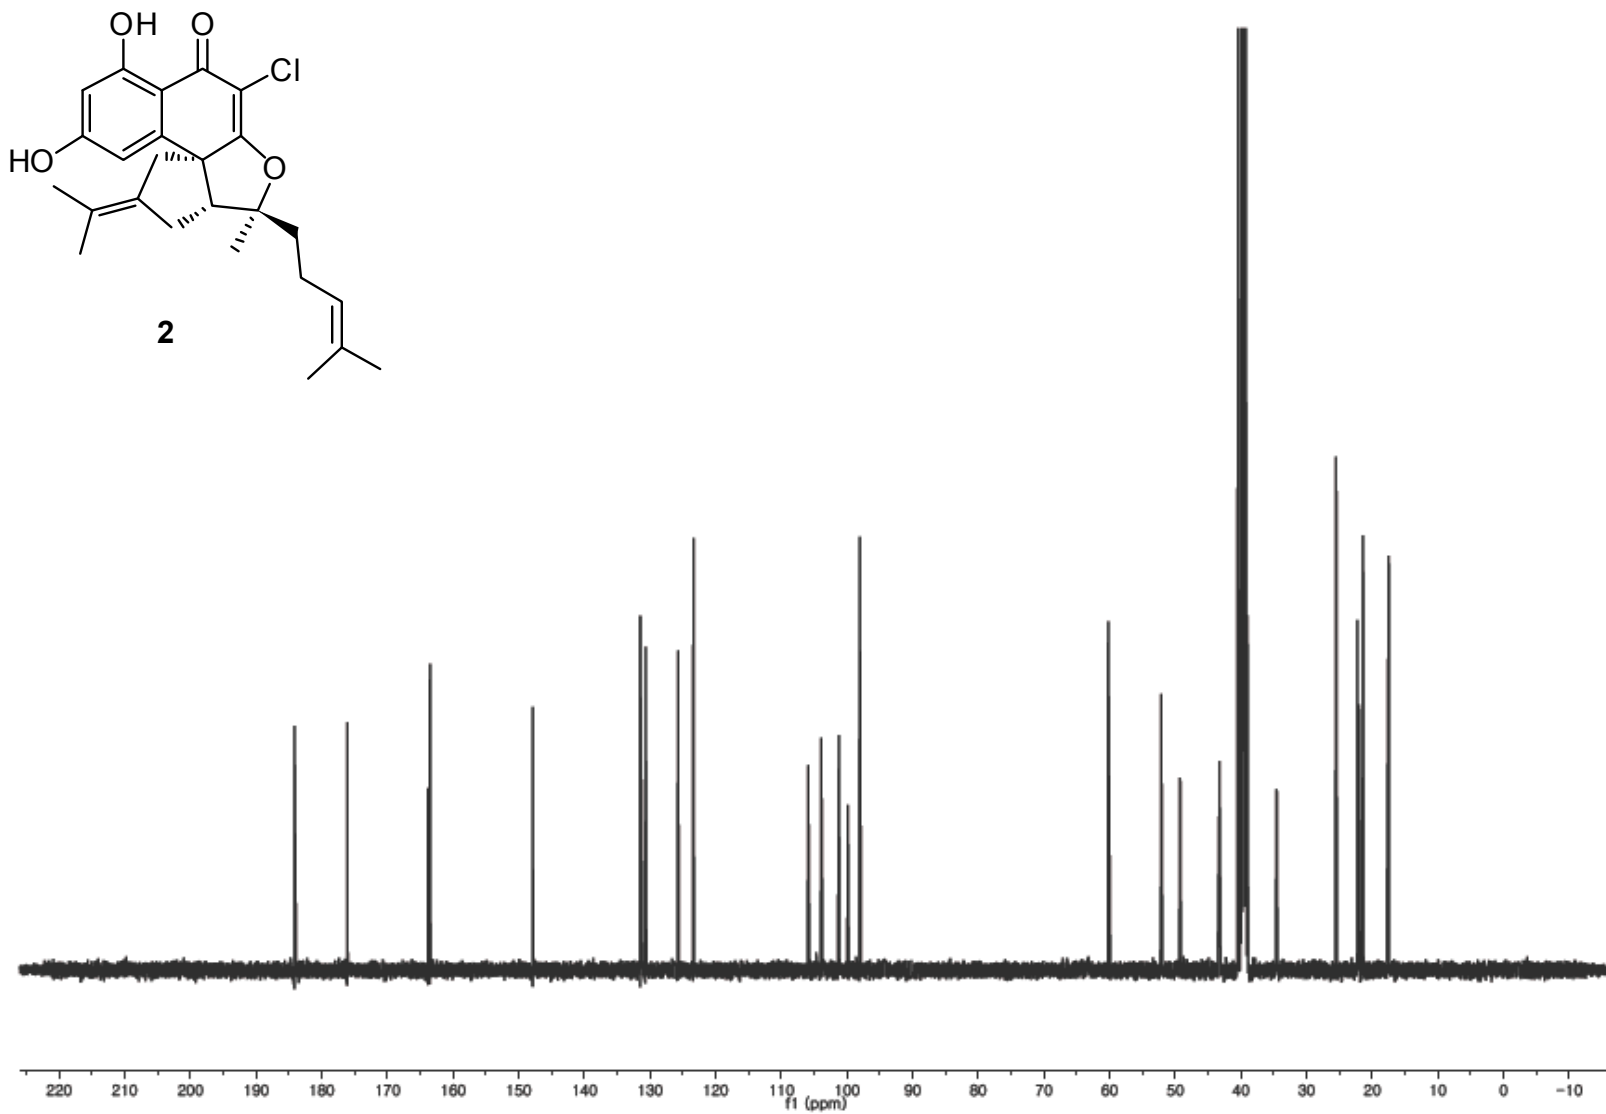



**Figure S9.** gCOSY Spectrum (500 MHz) of Merochlorin B (**2**) in DMSO- $d_6$

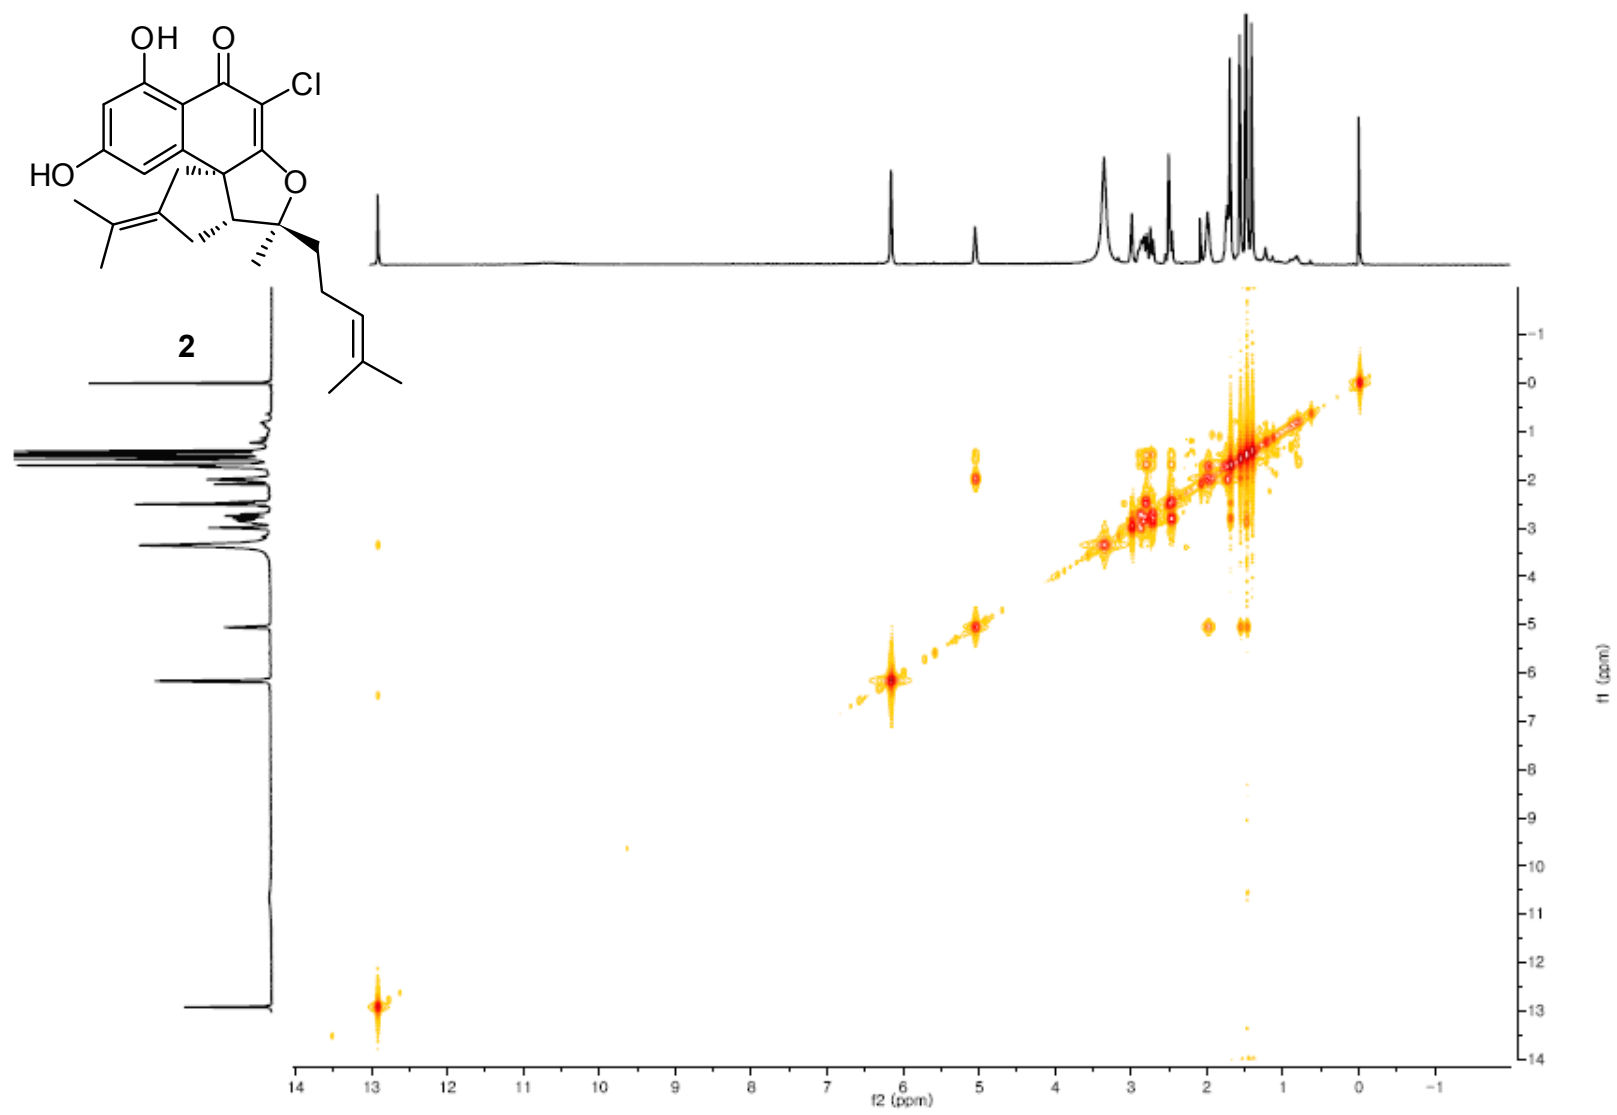

**Figure S10.** gHSQC Spectrum (500 MHz) of Merochlorin B (**2**) in DMSO-*d*<sub>6</sub>

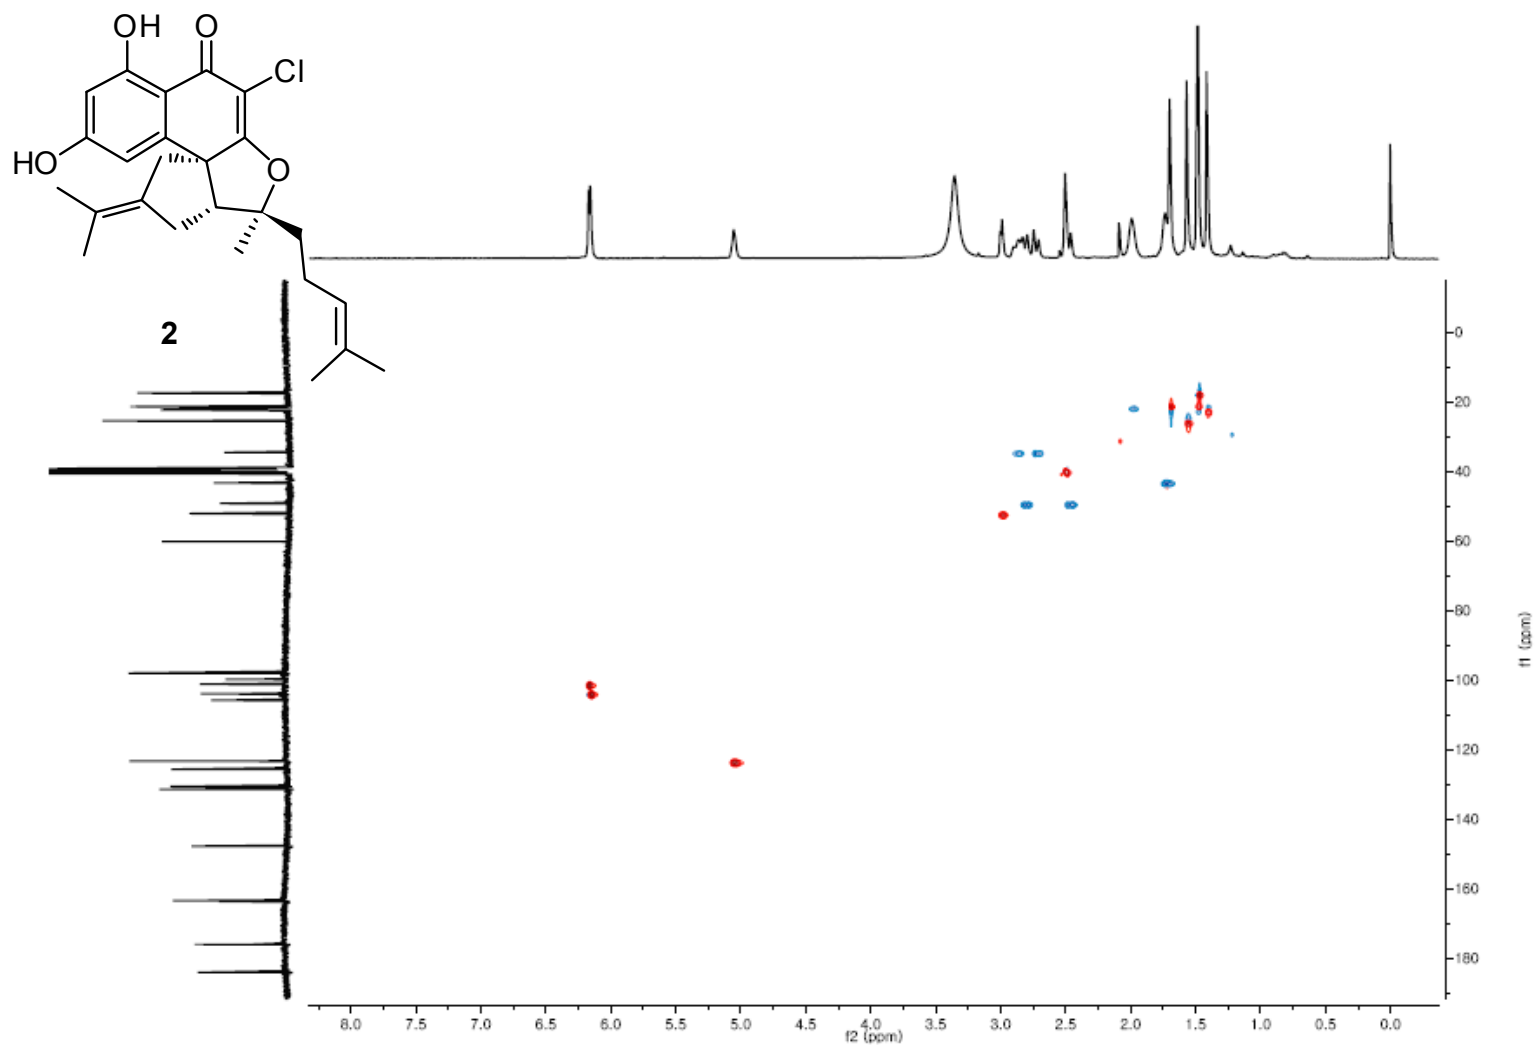

**Figure S11.** gHMBC Spectrum (500 MHz) of Merochlorin B (**2**) in DMSO- $d_6$

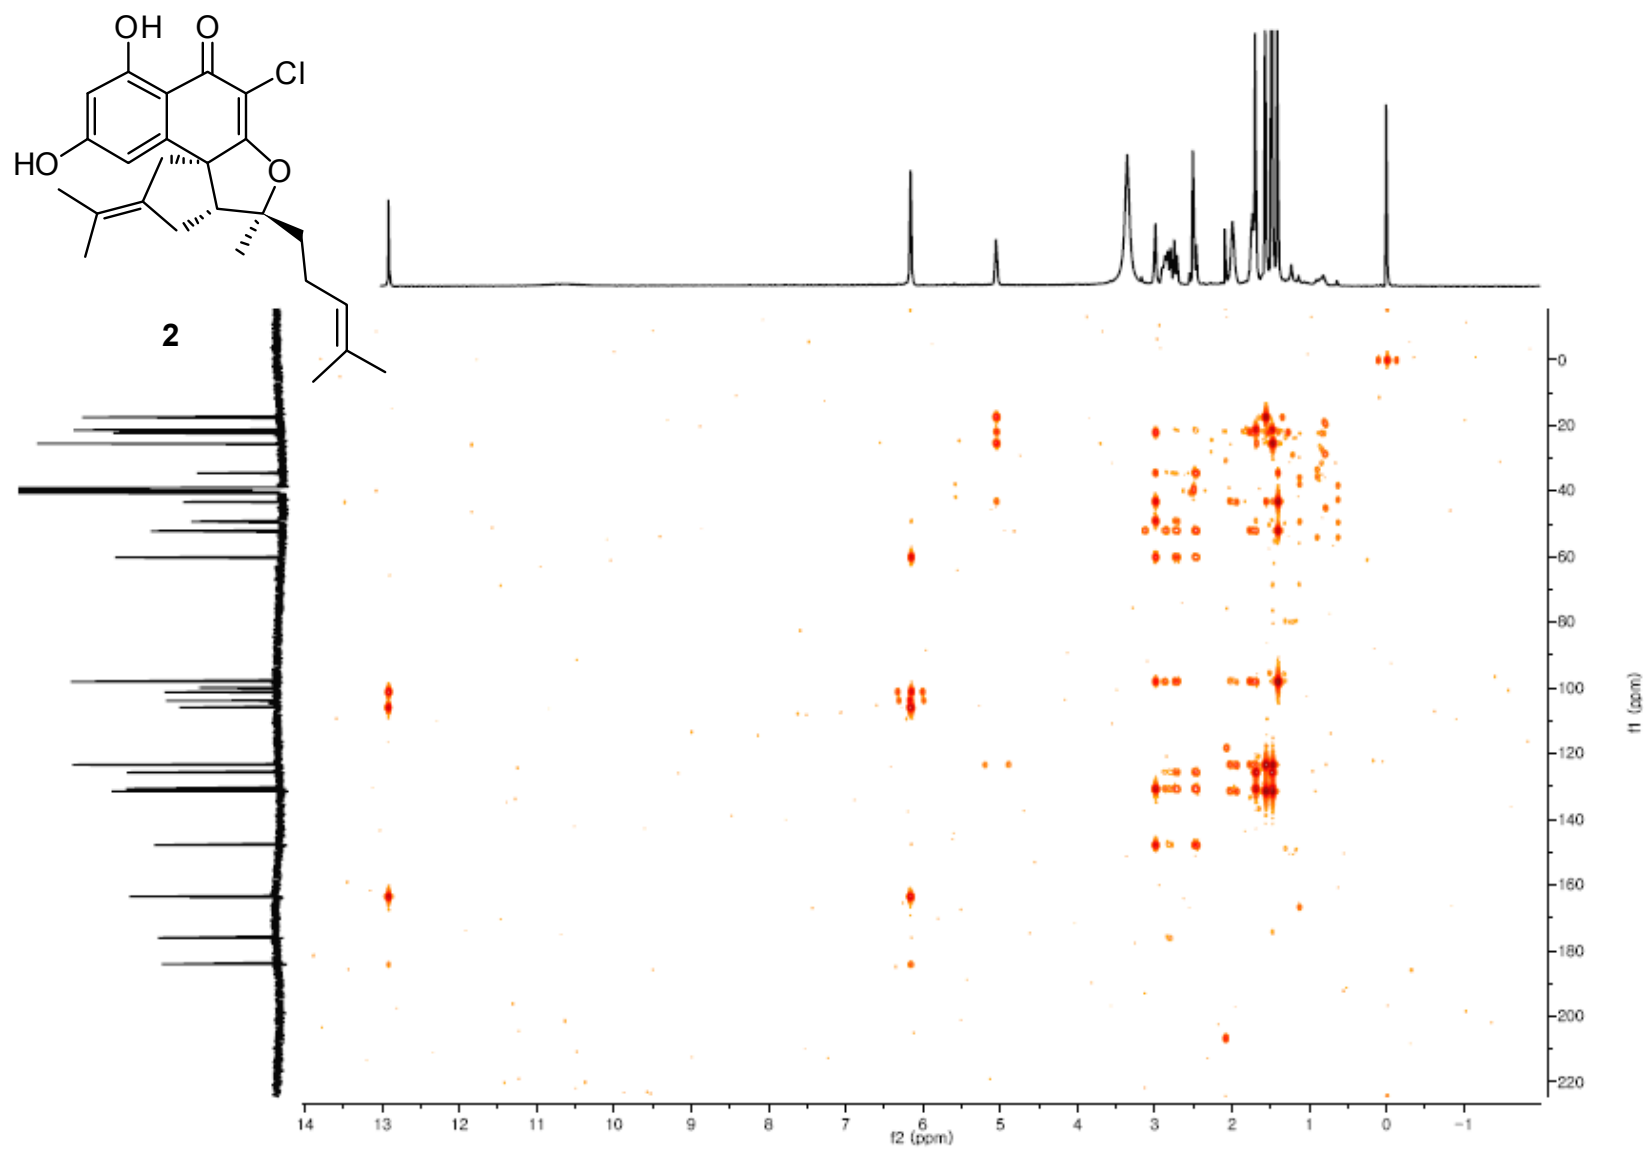

**Figure S12.** ROESY Spectrum (500 MHz) of Merochlorin B (**2**) in DMSO- $d_6$

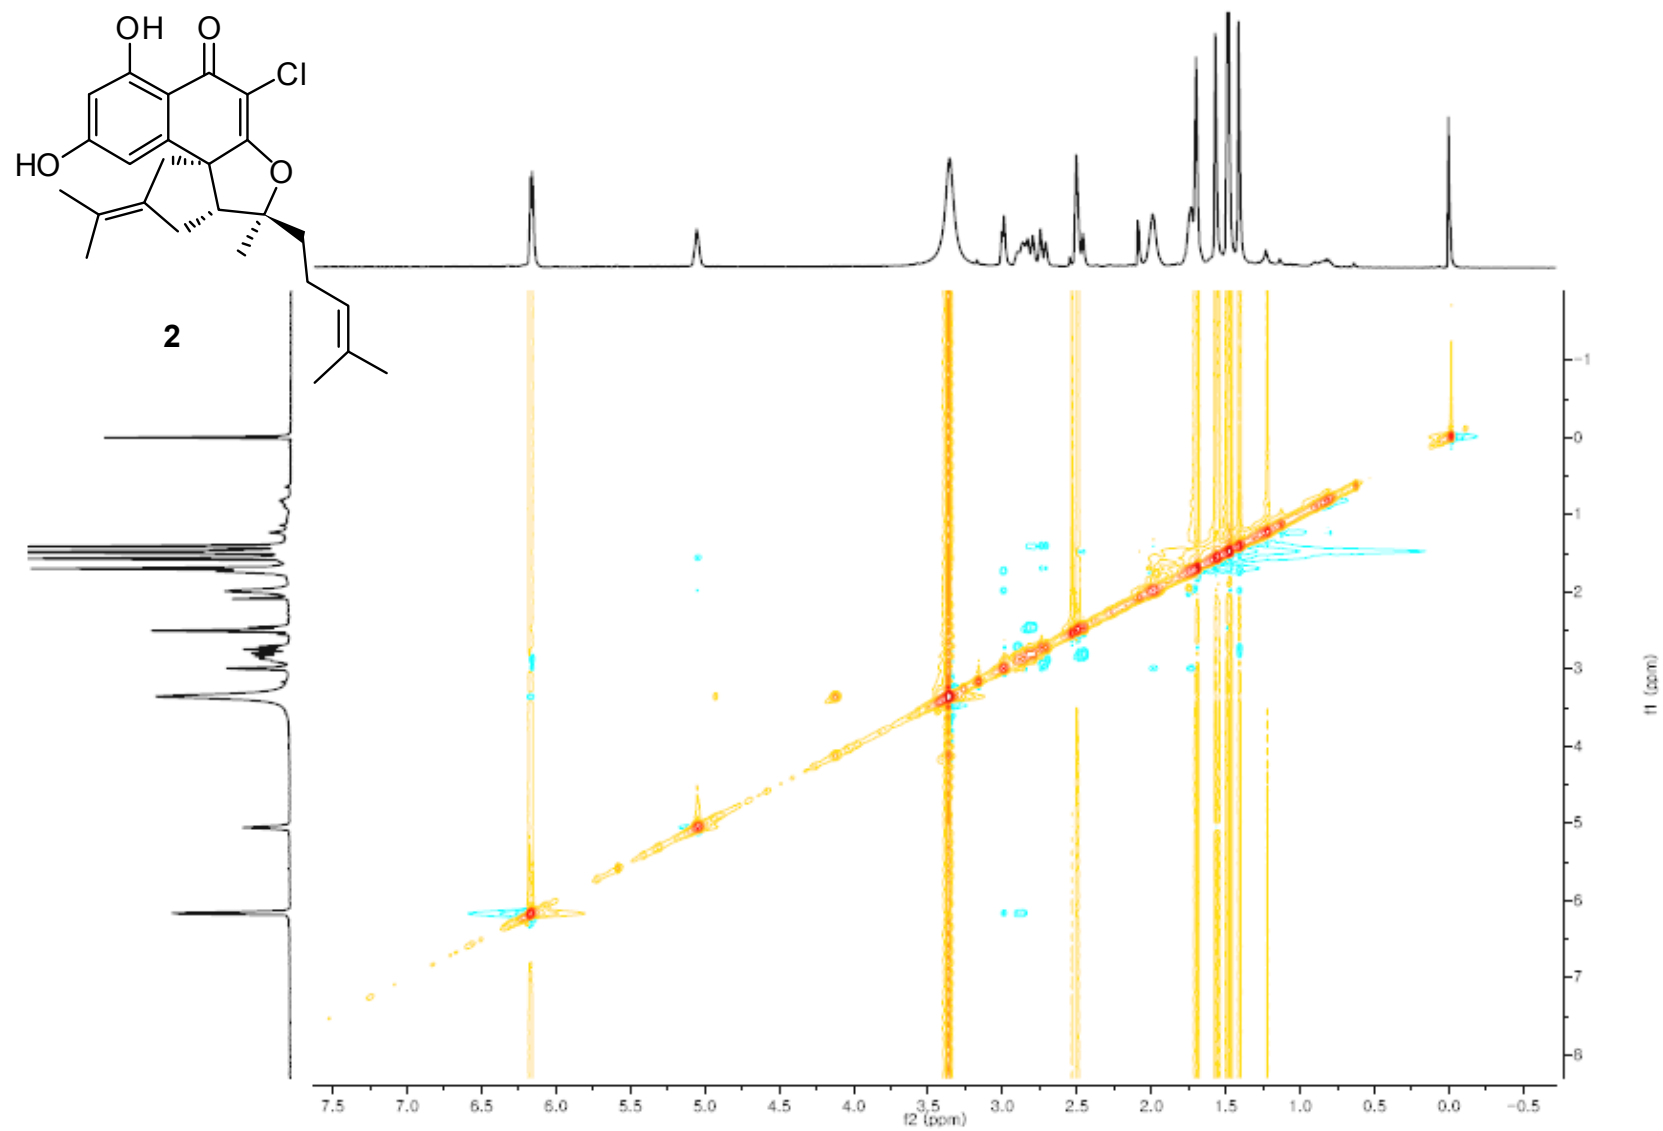

**Figure S13.**  $^1\text{H}$  NMR Spectrum (500 MHz) of Merochlorin C (**3**) in  $\text{DMSO-}d_6$

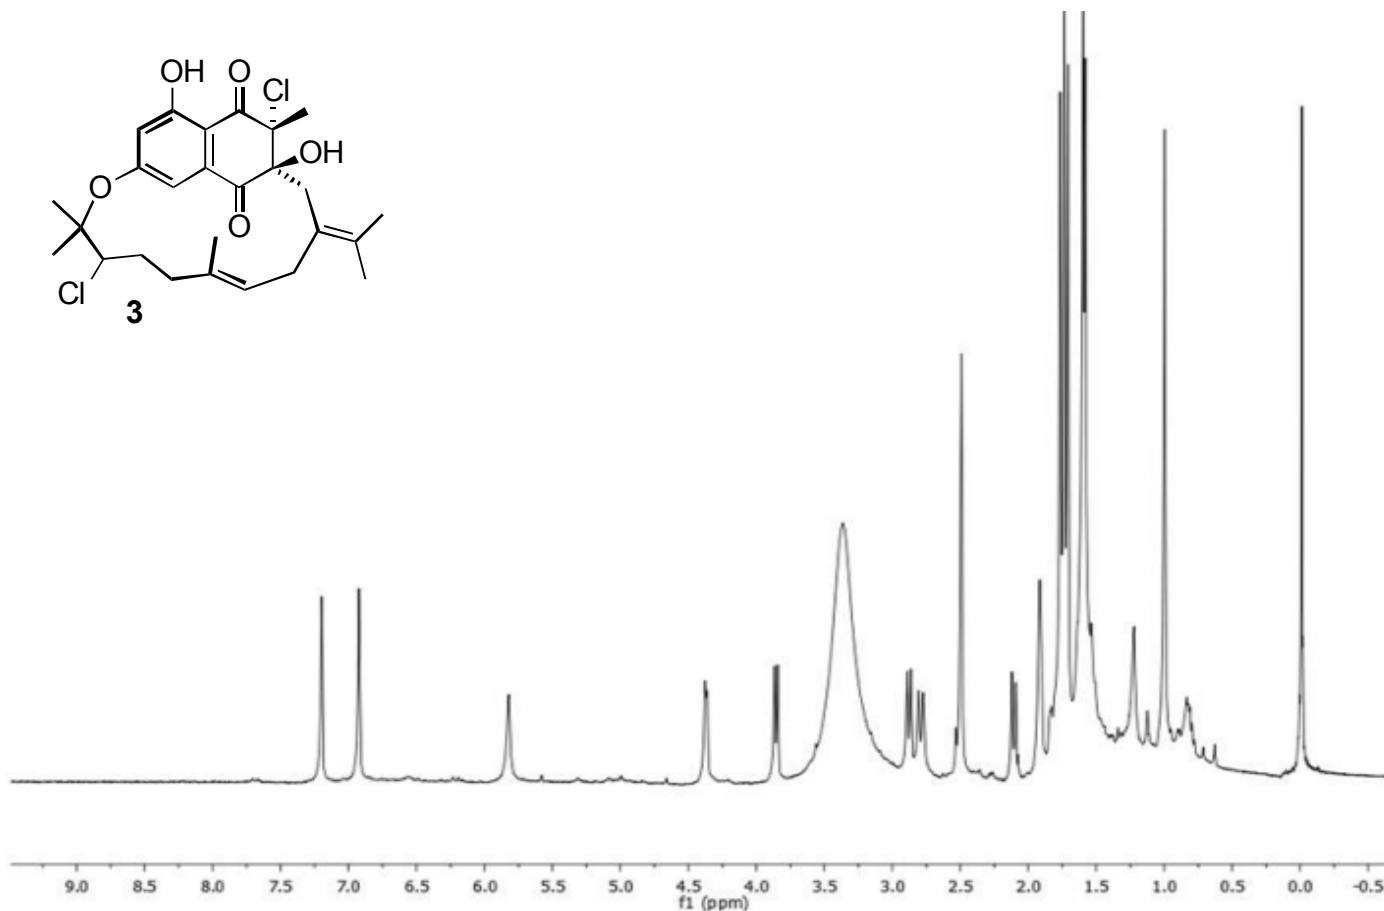

**Figure S14.**  $^{13}\text{C}$  NMR Spectrum (125 MHz) of Merochlorin C (**3**) in  $\text{DMSO-}d_6$

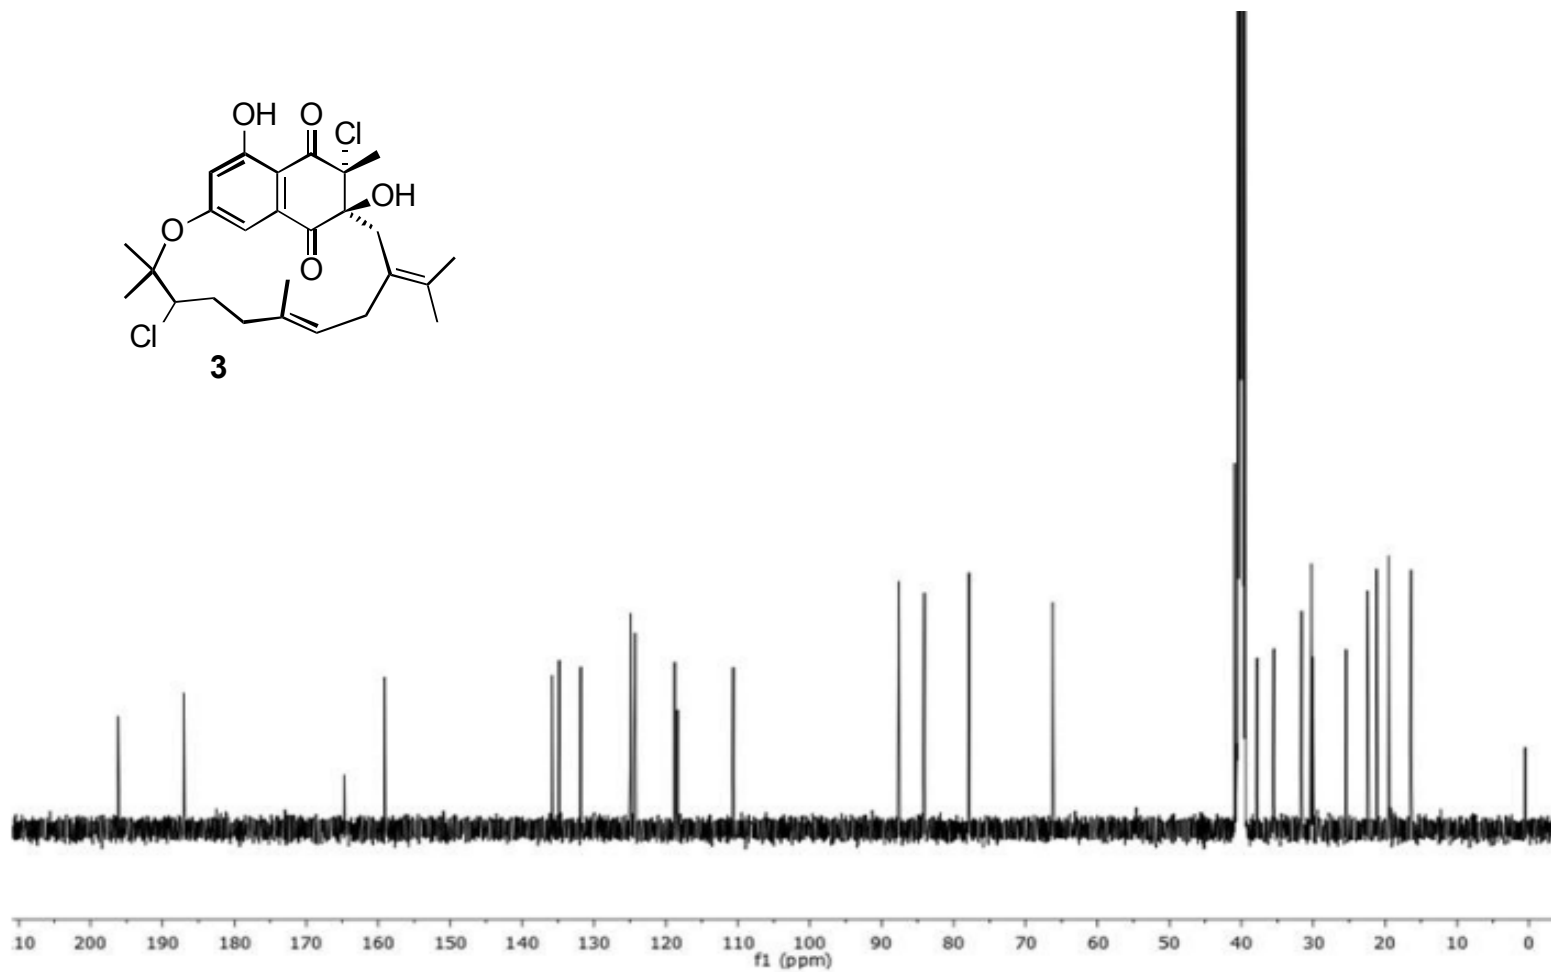

**Figure S15.**  $^1\text{H}$  NMR Spectrum (500 MHz) of Merochlorin D (**4**) in  $\text{DMSO-}d_6$

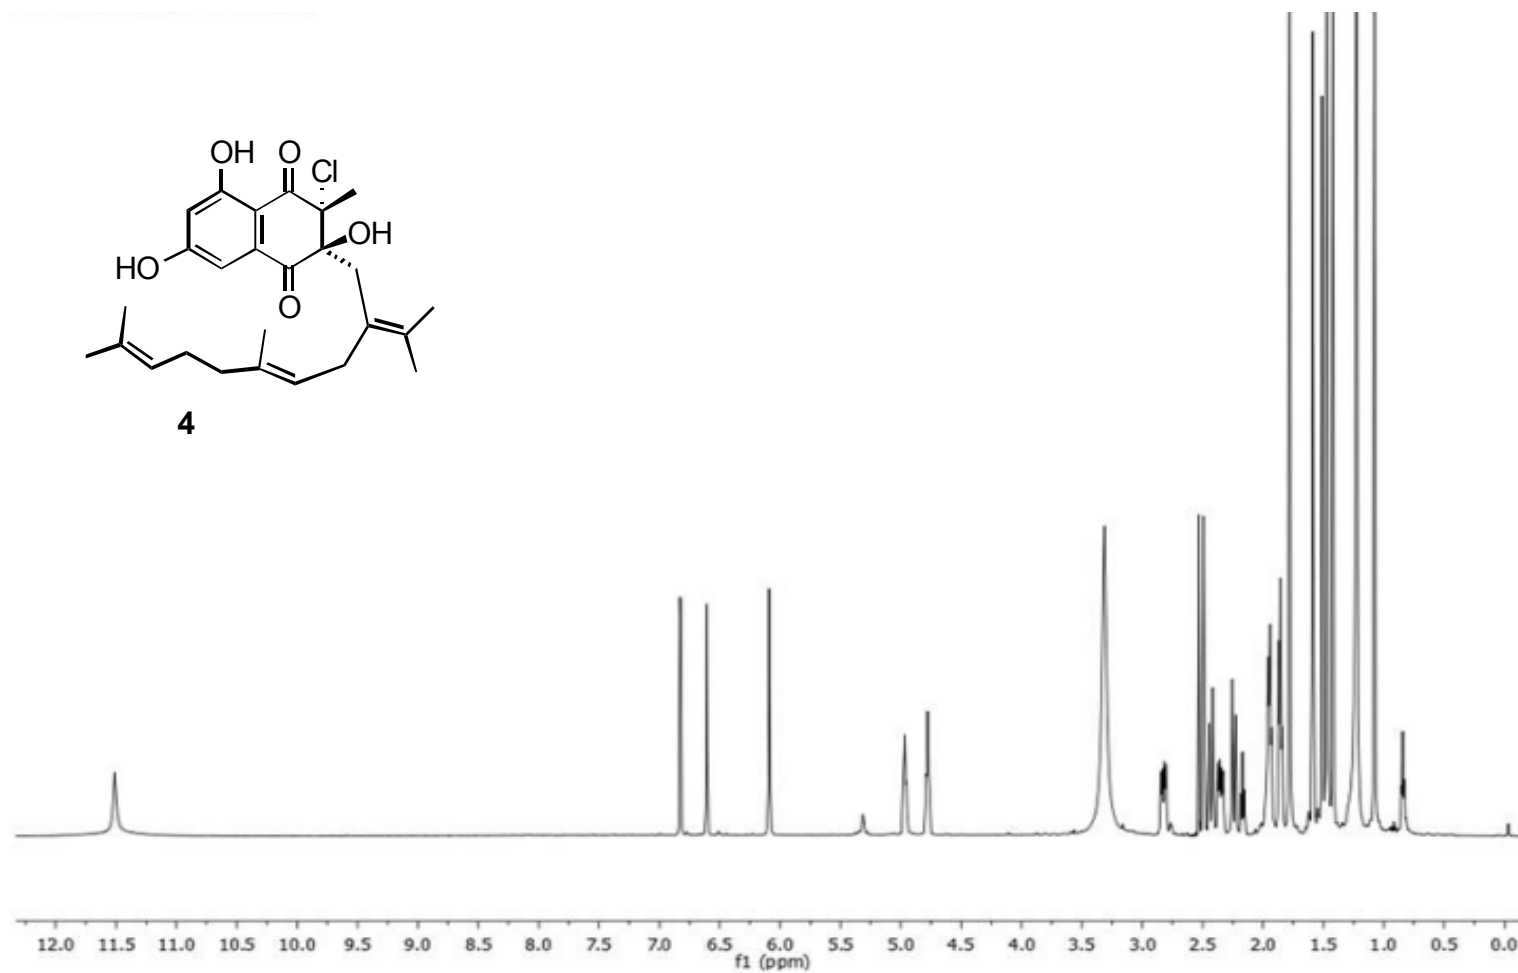

**Figure S16.**  $^1\text{H}$  NMR Spectrum (75 MHz) of Merochlorin D (**4**) in  $\text{DMSO-}d_6$

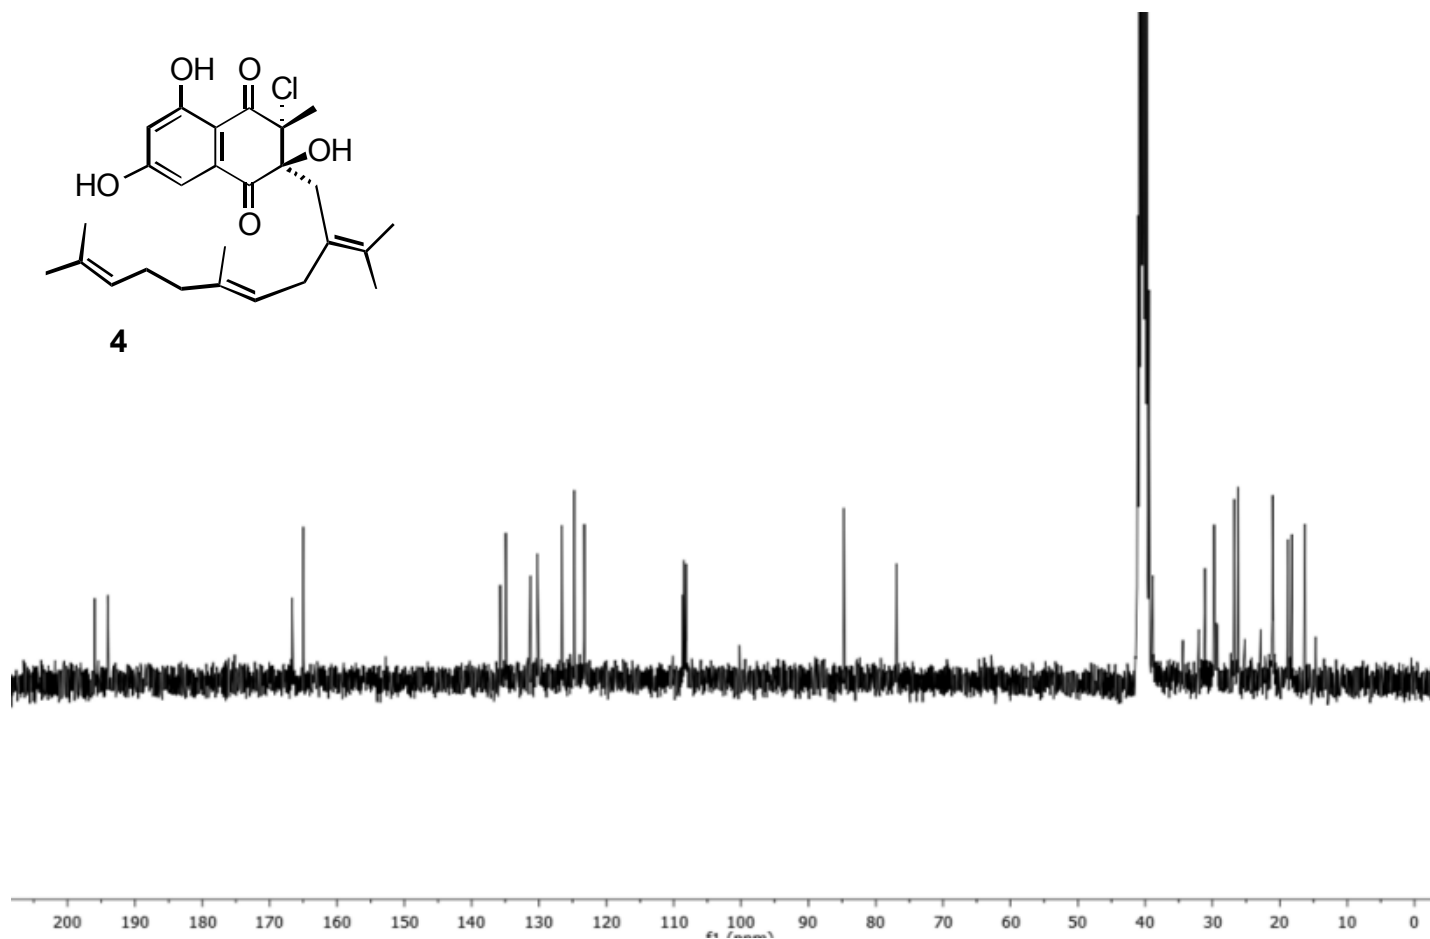



**Figure S17.** Contigs obtained from Illumina-sequencing of the *Streptomyces* sp. CNH-189 genome with homologous genes to the napyradiomycin biosynthetic gene cluster

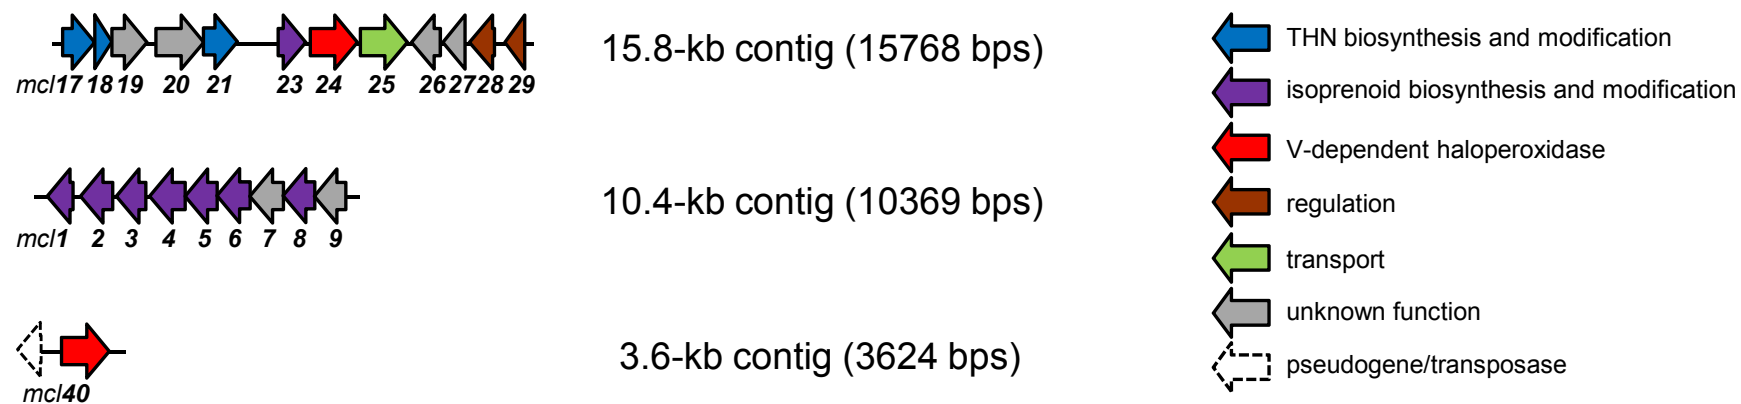

**Figure S18.** LC-MS analysis of extracts from *S. coelicolor* M1154/merLK01. Extracted ion chromatograms: (i),  $m/z$  429 (merochlorins A **1** and B **2**); (ii),  $m/z$  461 (merochlorin D **4**); (iii),  $m/z$  495 (merochlorin C **3**).

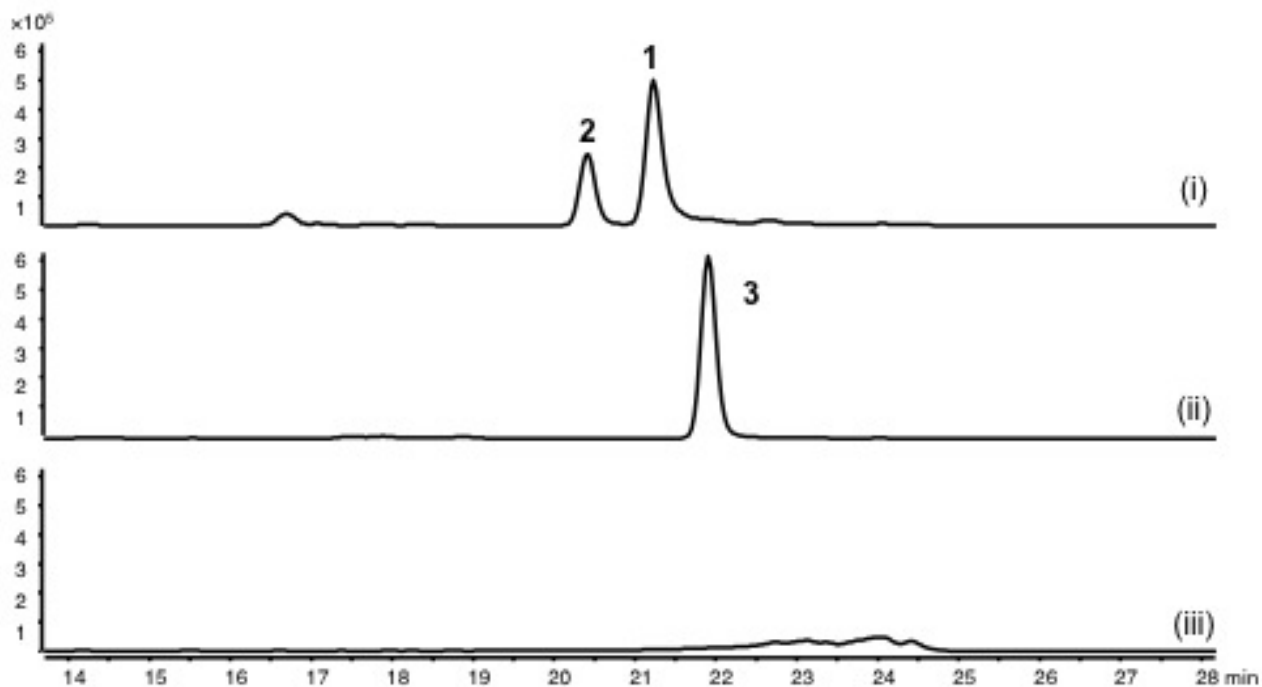

## References

- (1) Sambrook, J.; Russell, D. W. *Molecular Cloning. A Laboratory Manual*; Cold Spring Harbor Laboratory Press: New York 2001.
- (2) Kieser, T.; Bibb, M. J.; Buttner, M. J.; Chater, K. F.; Hopwood, D. A. *Practical Streptomyces Genetics*; John Innes Foundation: Norwich, UK, 2000.
- (3) Sakoulas, G.; Nam, S. J.; Loesgen, S.; Fenical, W.; Jensen, P. R.; Nizet, V.; Hensler, M. *PLoS ONE* **2012**, *7*, e29439.
- (4) Winter, J. M.; Moffitt, M. C.; Zazopoulos, E.; McAlpine, J. B.; Dorrestein, P. C.; Moore, B. S. *J Biol Chem* **2007**, *282*, 16362-8.
- (5) Austin, M. B.; Izumikawa, M.; Bowman, M. E.; Udworthy, D. W.; Ferrer, J. L.; Moore, B. S.; Noel, J. P. *J Biol Chem* **2004**, *279*, 45162-74.
- (6) Bibb, M. J.; Findlay, P. R.; Johnson, M. W. *Gene* **1984**, *30*, 157-66.
- (7) Altschul, S. F.; Madden, T. L.; Schaffer, A. A.; Zhang, J.; Zhang, Z.; Miller, W.; Lipman, D. J. *Nucleic Acids Res* **1997**, *25*, 3389-402.
- (8) Marchler-Bauer, A.; Anderson, J. B.; Derbyshire, M. K.; DeWeese-Scott, C.; Gonzales, N. R.; Gwadz, M.; Hao, L.; He, S.; Hurwitz, D. I.; Jackson, J. D.; Ke, Z.; Krylov, D.; Lanczycki, C. J.; Liebert, C. A.; Liu, C.; Lu, F.; Lu, S.; Marchler, G. H.; Mullokandov, M.; Song, J. S.; Thanki, N.; Yamashita, R. A.; Yin, J. J.; Zhang, D.; Bryant, S. H. *Nucleic Acids Res* **2007**, *35*, D237-40.
- (9) Larkin, M. A.; Blackshields, G.; Brown, N. P.; Chenna, R.; McGettigan, P. A.; McWilliam, H.; Valentin, F.; Wallace, I. M.; Wilm, A.; Lopez, R.; Thompson, J. D.; Gibson, T. J.; Higgins, D. G. *Bioinformatics* **2007**, *23*, 2947-8.
- (10) Nicholas, K. B.; Nicholas, H. B. J.; Deerfield, D. W. I. *EMBNEW.NEWS* **1997**, *4*.
- (11) Datsenko, K. A.; Wanner, B. L. *Proc.Natl.Acad.Sci.U.S.A.* **2000**, *97*, 6640-6645.
- (12) Priefer, U. B.; Simon, R.; Puhler, A. *J Bacteriol* **1985**, *163*, 324-30.
- (13) Bierman, M.; Logan, R.; O'Brien, K.; Seno, E. T.; Rao, R. N.; Schoner, B. E. *Gene* **1992**, *116*, 43-49.
- (14) Eustaquio, A. S.; McGlinchey, R. P.; Liu, Y.; Hazzard, C.; Beer, L. L.; Florova, G.; Alhamadsheh, M. M.; Lechner, A.; Kale, A. J.; Kobayashi, Y.; Reynolds, K. A.; Moore, B. S. *Proc Natl Acad Sci U S A* **2009**, *106*, 12295-300.
- (15) Gust, B.; Challis, G. L.; Fowler, K.; Kieser, T.; Chater, K. F. *Proc Natl Acad Sci U S A* **2003**, *100*, 1541-6.
- (16) MacNeil, D. J. *J Bacteriol* **1988**, *170*, 5607-12.
- (17) Gomez-Escribano, J. P.; Bibb, M. J. *Microb Biotechnol*, *4*, 207-15.
- (18) Flett, F.; Mersinias, V.; Smith, C. P. *FEMS Microbiology Letters* **1997**, *155*, 223-229.
